# Supplementary material for: Evaluation of pH-dependent amphiphilic carbosilane dendrons in micelle formation, drug loading and HIV-1 infection
Source: Royal Society of Chemistry journal article supplement (doi:10.1039/d0ob01867h), 2020-01-01
Supplement: d0ob01867h1.pdf [file d0ob01867h1.pdf]

## SUPPLEMENTARY INFORMATION

Manuscript submitted to: Organic & Biomolecular Chemistry

Article Type: *Regular Article*.

Corresponding Author: Prof. Dr. Rafael Gómez Ramírez  
Department of Organic and Inorganic Chemistry  
University of Alcalá  
UAH Campus. Faculty of Pharmacy  
28871 Alcalá de Henares. Spain  
Tel: (+34) 91 8854679.  
E-mail: [rafael.gomez@uah.es](mailto:rafael.gomez@uah.es)

### Evaluation of pH-dependent amphiphilic carbosilane dendrons in micelle formation, drug loading and HIV-1 infection

**Gabriel Mencia<sup>1,2,3</sup>, Tania Lozano-Cruz<sup>1,2,3</sup>, Mercedes Valiente<sup>4</sup>, Jose Luis Jimenez<sup>2,6,7</sup>, Fco. Javier de la Mata<sup>1,2,3</sup>, M<sup>a</sup> Ángeles Muñoz-Fernández<sup>2,5,7</sup>, Jesús Cano<sup>1,2,3</sup>, Elizabeth Gillies<sup>8</sup> and Rafael Gómez<sup>1,2,3,\*</sup>**

<sup>1</sup> Department of Organic and Inorganic Chemistry, and Research Institute in Chemistry "Andrés M. Del Río" (IQAR), University of Alcalá, Madrid, Spain.

<sup>2</sup> Networking Research Center on Bioengineering, Biomaterials and Nanomedicine (CIBER-BBN), Spain.

<sup>3</sup> Ramón y Cajal Health Research Institute (IRYCIS), IRYCIS, Madrid 28034, Spain.

<sup>4</sup> Department of Analytical Chemistry, Physical Chemistry and Chemical Engineering and Research Institute in Chemistry "Andrés M. Del Río" (IQAR), University of Alcalá, Madrid, Spain.

<sup>5</sup> Head of Immunology. Molecular Immunobiology Laboratory, General University Hospital Gregorio Marañón (HGUGM), Madrid 28007, Spain.

<sup>6</sup> Laboratory Platform (Immunology). General University Hospital Gregorio Marañón (HGUGM), Madrid 28007, Spain.

<sup>7</sup> Health Research Institute Gregorio Marañón (HGUGM), Spanish HIV HGM BioBank, Madrid 28007, Spain.

<sup>8</sup> Department of Chemistry, Department of Chemical and Biochemical Engineering, and the School of Biomedical Engineering at the University of Western Ontario, London, Canada, N6G1Z1

\* Corresponding author: [rafael.gomez@uah.es](mailto:rafael.gomez@uah.es); Tel: (+34) 91 8854685

Rafael Gómez Ramírez: [orcid.org/0000-0001-6448-2414](https://orcid.org/0000-0001-6448-2414)

M<sup>a</sup> Angeles Muñoz-Fernández: [orcid.org/0000-0002-0813-4500](https://orcid.org/0000-0002-0813-4500)

Elizabeth Gillies: [orcid.org/0000-0002-3983-2248](https://orcid.org/0000-0002-3983-2248)

Gabriel Mencia: [orcid.org/0000-0001-9555-7503](https://orcid.org/0000-0001-9555-7503)

## Table of contents

|                                                                                                                                           |    |
|-------------------------------------------------------------------------------------------------------------------------------------------|----|
| Figure S1. $^1\text{H-NMR}$ spectrum of dendron $\text{PalG}_1(\text{S-CO}_2\text{H})_2$ ( <b>1</b> ) in $\text{CDCl}_3$ .                | 4  |
| Figure S2. $^{13}\text{C-NMR}$ spectrum of dendron $\text{PalG}_1(\text{S-CO}_2\text{H})_2$ ( <b>1</b> ) in $\text{CDCl}_3$ .             | 4  |
| Figure S3. Molecular ion spectrum of dendron $\text{PalG}_1(\text{S-CO}_2\text{H})_2$ ( <b>1</b> ).                                       | 5  |
| Figure S4. $^1\text{H-NMR}$ spectrum of dendron $\text{PalG}_2(\text{S-CO}_2\text{H})_4$ ( <b>2</b> ) in $\text{CDCl}_3$ .                | 5  |
| Figure S5. $^{13}\text{C-NMR}$ spectrum of dendron $\text{PalG}_2(\text{S-CO}_2\text{H})_4$ ( <b>2</b> ) in $\text{CDCl}_3$ .             | 6  |
| Figure S6. Molecular ion spectrum of dendron $\text{PalG}_2(\text{S-CO}_2\text{H})_4$ ( <b>2</b> ).                                       | 6  |
| Figure S7. $^1\text{H-NMR}$ spectrum of dendron $\text{PalG}_3(\text{S-CO}_2\text{H})_8$ ( <b>3</b> ) in $\text{CDCl}_3$ .                | 7  |
| Figure S8. $^{13}\text{C-NMR}$ spectrum of dendron $\text{PalG}_3(\text{S-CO}_2\text{H})_8$ ( <b>3</b> ) in $\text{CDCl}_3$ .             | 7  |
| Figure S9. Molecular ion spectrum of dendron $\text{PalG}_3(\text{S-CO}_2\text{H})_8$ ( <b>3</b> ).                                       | 8  |
| Figure S10. $^1\text{H-NMR}$ spectrum of dendron $\text{PalG}_1(\text{S-(CO}_2\text{H)}_2)_2$ ( <b>4</b> ) in $\text{CD}_3\text{OD}$ .    | 8  |
| Figure S11. $^{13}\text{C-NMR}$ spectrum of dendron $\text{PalG}_1(\text{S-(CO}_2\text{H)}_2)_2$ ( <b>4</b> ) in $\text{CD}_3\text{OD}$ . | 9  |
| Figure S12. Molecular ion spectrum of dendron $\text{PalG}_1(\text{S-(CO}_2\text{H)}_2)_2$ ( <b>4</b> ).                                  | 9  |
| Figure S13. $^1\text{H-NMR}$ spectrum of dendron $\text{PalG}_2(\text{S-(CO}_2\text{H)}_2)_4$ ( <b>5</b> ) in $\text{CD}_3\text{OD}$ .    | 10 |
| Figure S14. $^{13}\text{C-NMR}$ spectrum of dendron $\text{PalG}_2(\text{S-(CO}_2\text{H)}_2)_4$ ( <b>5</b> ) in $\text{CD}_3\text{OD}$ . | 10 |
| Figure S15. Molecular ion spectrum of dendron $\text{PalG}_2(\text{S-(CO}_2\text{H)}_2)_4$ ( <b>5</b> ).                                  | 11 |
| Figure S16. $^1\text{H-NMR}$ spectrum of dendron $\text{PalG}_3(\text{S-(CO}_2\text{H)}_2)_8$ ( <b>6</b> ) in $\text{CD}_3\text{OD}$ .    | 11 |
| Figure S17. $^{13}\text{C-NMR}$ spectrum of dendron $\text{PalG}_3(\text{S-(CO}_2\text{H)}_2)_8$ ( <b>6</b> ) in $\text{CD}_3\text{OD}$ . | 12 |
| Figure S18. Molecular ion spectrum of dendron $\text{PalG}_3(\text{S-(CO}_2\text{H)}_2)_8$ ( <b>6</b> ).                                  | 12 |
| Figure S19. $^1\text{H-NMR}$ spectrum of dendron $\text{PalG}_1(\text{S-CO}_2\text{Na})_2$ ( <b>7</b> ) in $\text{D}_2\text{O}$ .         | 13 |
| Figure S20. $^{13}\text{C-NMR}$ spectrum of dendron $\text{PalG}_1(\text{S-CO}_2\text{Na})_2$ ( <b>7</b> ) in $\text{D}_2\text{O}$ .      | 13 |
| Figure S21. Molecular ion spectrum of dendron $\text{PalG}_1(\text{S-CO}_2\text{Na})_2$ ( <b>7</b> ).                                     | 14 |
| Figure S22. $^1\text{H-NMR}$ spectrum of dendron $\text{PalG}_2(\text{S-CO}_2\text{Na})_4$ ( <b>8</b> ) in $\text{D}_2\text{O}$ .         | 14 |
| Figure S23. $^{13}\text{C-NMR}$ spectrum of dendron $\text{PalG}_2(\text{S-CO}_2\text{Na})_4$ ( <b>8</b> ) in $\text{D}_2\text{O}$ .      | 15 |
| Figure S24. Molecular ion spectrum of dendron $\text{PalG}_2(\text{S-CO}_2\text{Na})_4$ ( <b>8</b> ).                                     | 15 |
| Figure S25. $^1\text{H-NMR}$ spectrum of dendron $\text{PalG}_3(\text{S-CO}_2\text{Na})_8$ ( <b>8</b> ) in $\text{D}_2\text{O}$ .         | 16 |
| Figure S26. $^{13}\text{C-NMR}$ spectrum of dendron $\text{PalG}_3(\text{S-CO}_2\text{Na})_8$ ( <b>8</b> ) in $\text{D}_2\text{O}$ .      | 16 |
| Figure S27. Molecular ion spectrum of dendron $\text{PalG}_3(\text{S-CO}_2\text{Na})_8$ ( <b>8</b> ).                                     | 17 |
| Figure S28. $^1\text{H-NMR}$ spectrum of dendron $\text{PalG}_1(\text{S-(CO}_2\text{H)}_2)_2$ ( <b>10</b> ) in $\text{D}_2\text{O}$ .     | 17 |
| Figure S29. $^{13}\text{C-NMR}$ spectrum of dendron $\text{PalG}_1(\text{S-(CO}_2\text{Na)}_2)_2$ ( <b>10</b> ) in $\text{D}_2\text{O}$ . | 18 |
| Figure S30. Mass spectrum of dendron $\text{PalG}_1(\text{S-(CO}_2\text{Na)}_2)_2$ ( <b>10</b> ).                                         | 18 |
| Figure S31. $^1\text{H-NMR}$ spectrum of dendron $\text{PalG}_2(\text{S-(CO}_2\text{H)}_2)_4$ ( <b>11</b> ) in $\text{D}_2\text{O}$ .     | 19 |
| Figure S32. $^{13}\text{C-NMR}$ spectrum of dendron $\text{PalG}_2(\text{S-(CO}_2\text{Na)}_2)_4$ ( <b>11</b> ) in $\text{D}_2\text{O}$ . | 19 |
| Figure S33. Mass spectrum of dendron $\text{PalG}_2(\text{S-(CO}_2\text{Na)}_2)_4$ ( <b>11</b> ).                                         | 20 |
| Figure S34. $^1\text{H-NMR}$ spectrum of dendron $\text{PalG}_3(\text{S-(CO}_2\text{H)}_2)_8$ ( <b>12</b> ) in $\text{D}_2\text{O}$ .     | 20 |
| Figure S35. $^{13}\text{C-NMR}$ spectrum of dendron $\text{PalG}_3(\text{S-(CO}_2\text{Na)}_2)_8$ ( <b>12</b> ) in $\text{D}_2\text{O}$ . | 21 |

|                                                                                                                                                             |    |
|-------------------------------------------------------------------------------------------------------------------------------------------------------------|----|
| Figure S36. Mass spectrum of dendron $\text{PalG}_3(\text{S}-(\text{CO}_2\text{Na})_2)_8$ ( <b>12</b> ).....                                                | 21 |
| Figure S37. Size distribution of $\text{PalG}_n(\text{S}-\text{CO}_2\text{Na})_m$ ( <b>7-8</b> ) measured by DLS. ....                                      | 22 |
| Figure S38. Size distribution of $\text{PalG}_n(\text{S}-(\text{CO}_2\text{Na})_2)_m$ ( <b>10-11</b> ) measured by DLS.....                                 | 22 |
| Figure S39. Size distribution of $\text{PalG}_1(\text{S}-\text{CO}_2\text{Na})_2$ ( <b>7</b> ) with and without ibuprofen sodium salt measured by DLS. .... | 23 |
| Figure S40. $1/F-F_0$ vs $1/([\text{Drug}]+[\text{Dendron}]-\text{CMC})$ graphic of ibuprofen sodium salt encapsulated by <b>7</b> .....                    | 23 |
| Figure S41. $1/(F-F_0)$ vs $1/([\text{Drug}]+[\text{Dendron}]-\text{CMC})$ graphic of procaine hydrochloride encapsulated by <b>7</b> .....                 | 24 |
| Figure S42. $1/(F-F_0)$ vs $1/([\text{Drug}]+[\text{Dendron}]-\text{CMC})$ graphic of ibuprofen sodium salt encapsulated by <b>10</b> .....                 | 24 |
| Figure S43. $1/(F-F_0)$ vs $1/([\text{Drug}]+[\text{Dendron}]-\text{CMC})$ graphic of procaine hydrochloride encapsulated by <b>10</b> .....                | 25 |

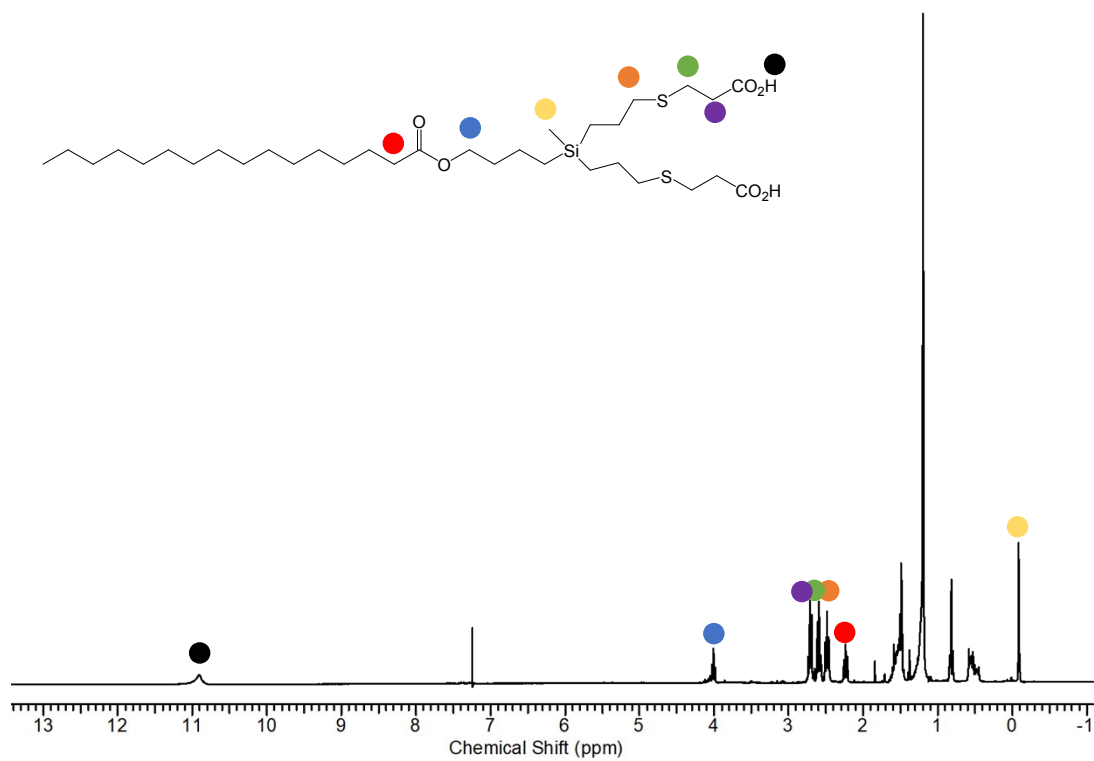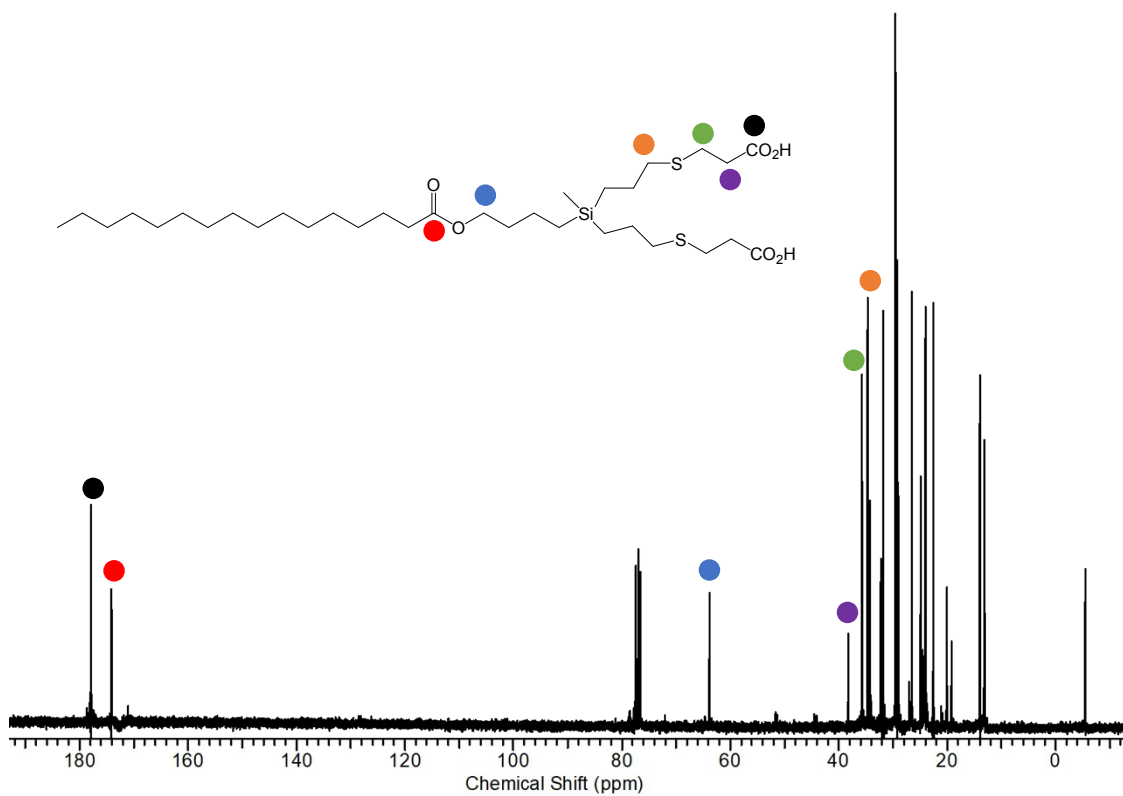

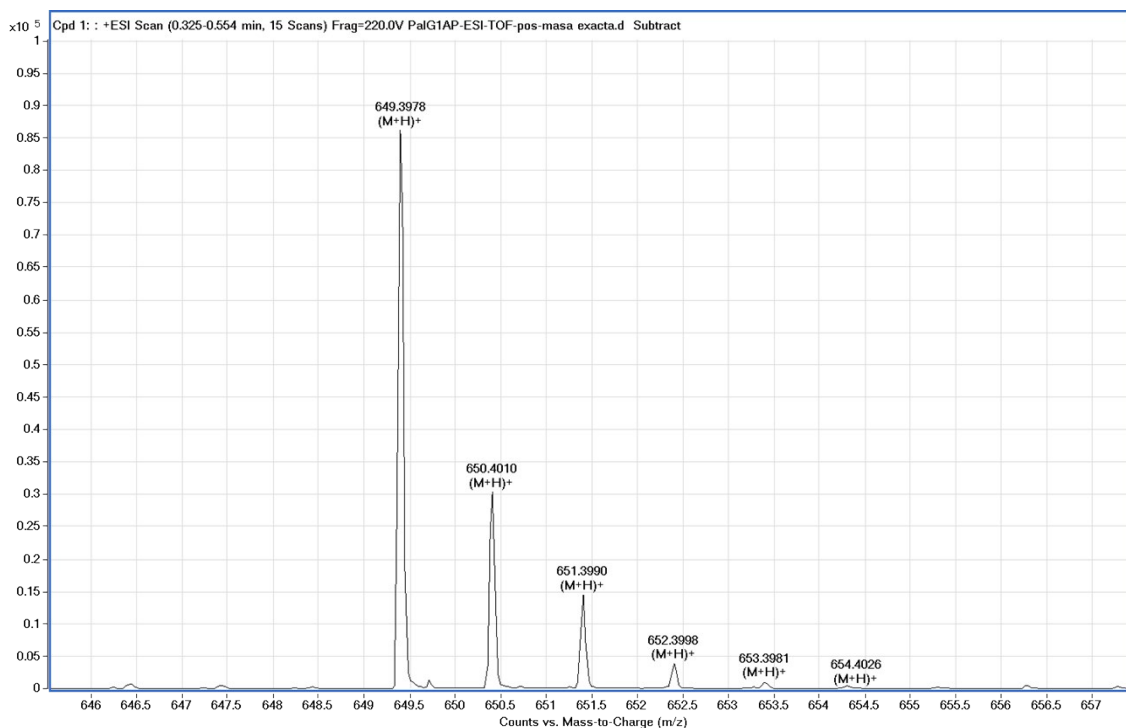

Figure S3. Molecular ion spectrum of dendron PalG<sub>1</sub>(S-CO<sub>2</sub>H)<sub>2</sub> (**1**).

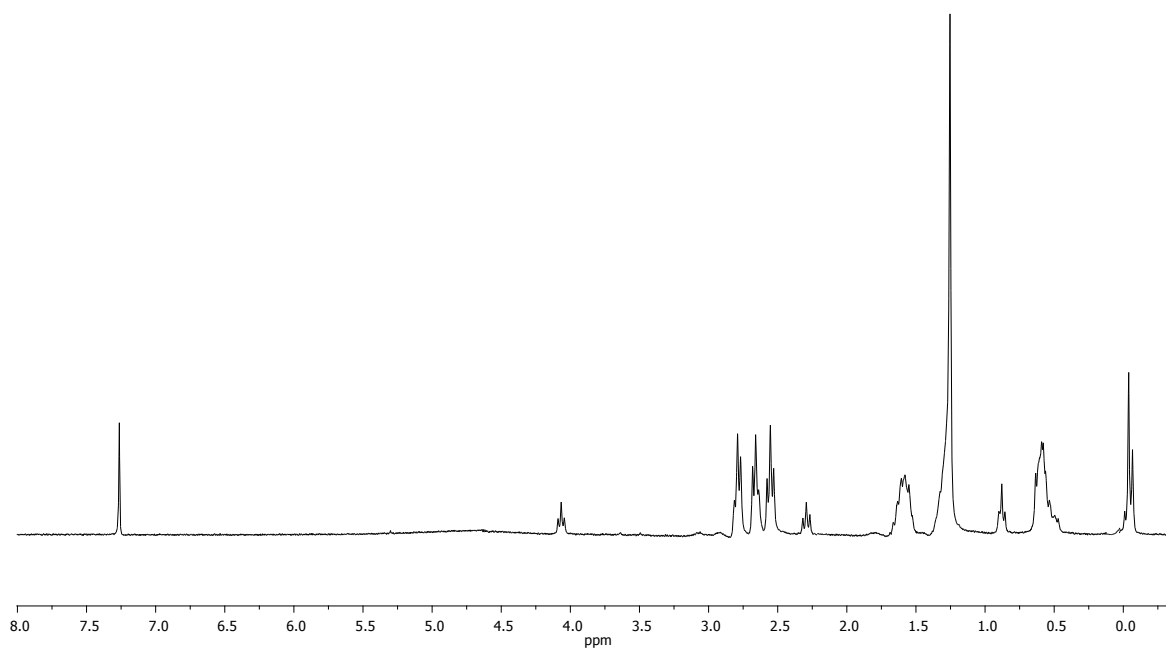

Figure S4. <sup>1</sup>H-NMR spectrum of dendron PalG<sub>2</sub>(S-CO<sub>2</sub>H)<sub>4</sub> (**2**) in CDCl<sub>3</sub>.

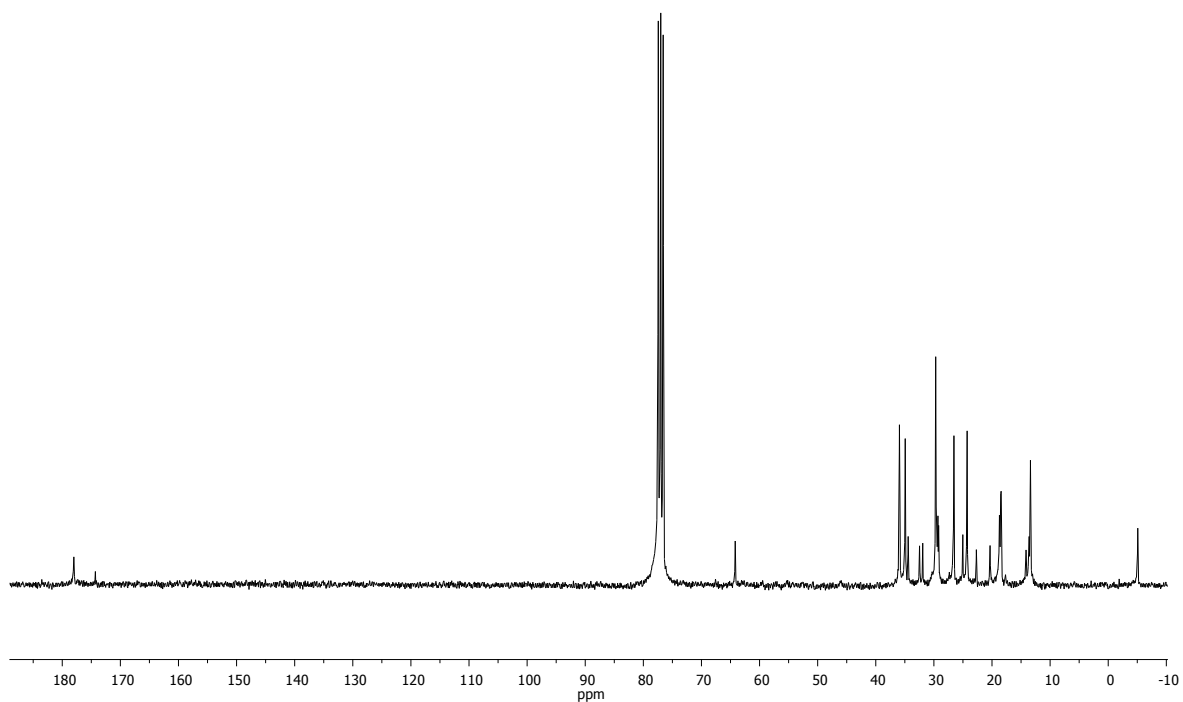

Figure S5.  $^{13}\text{C}$ -NMR spectrum of dendron  $\text{PaIG}_2(\text{S-CO}_2\text{H})_4$  (**2**) in  $\text{CDCl}_3$ .

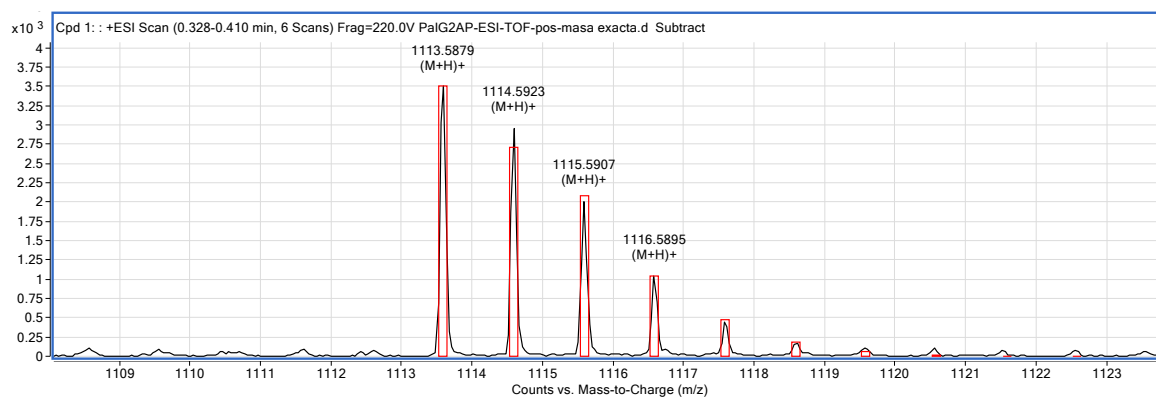

Figure S6. Molecular ion spectrum of dendron  $\text{PaIG}_2(\text{S-CO}_2\text{H})_4$  (**2**).

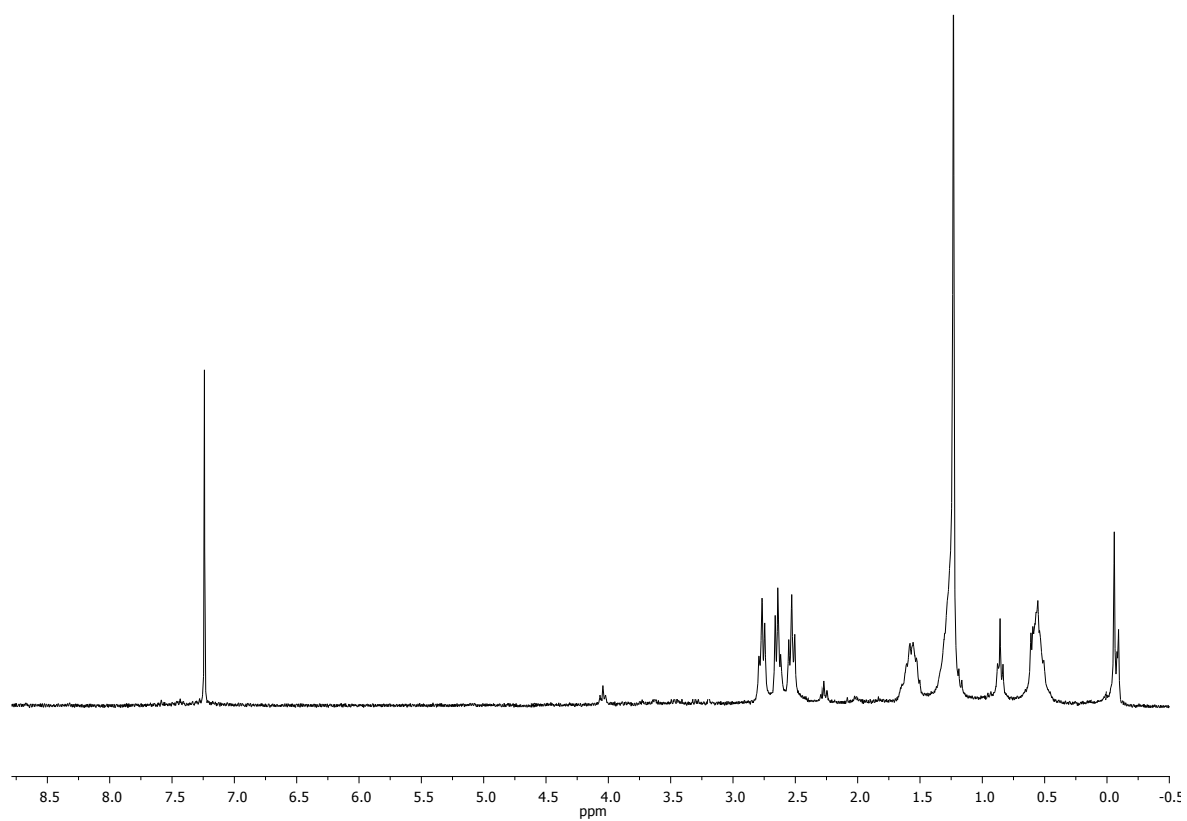

Figure S7. <sup>1</sup>H-NMR spectrum of dendron PaIG<sub>3</sub>(S-CO<sub>2</sub>H)<sub>8</sub> (**3**) in CDCl<sub>3</sub>.

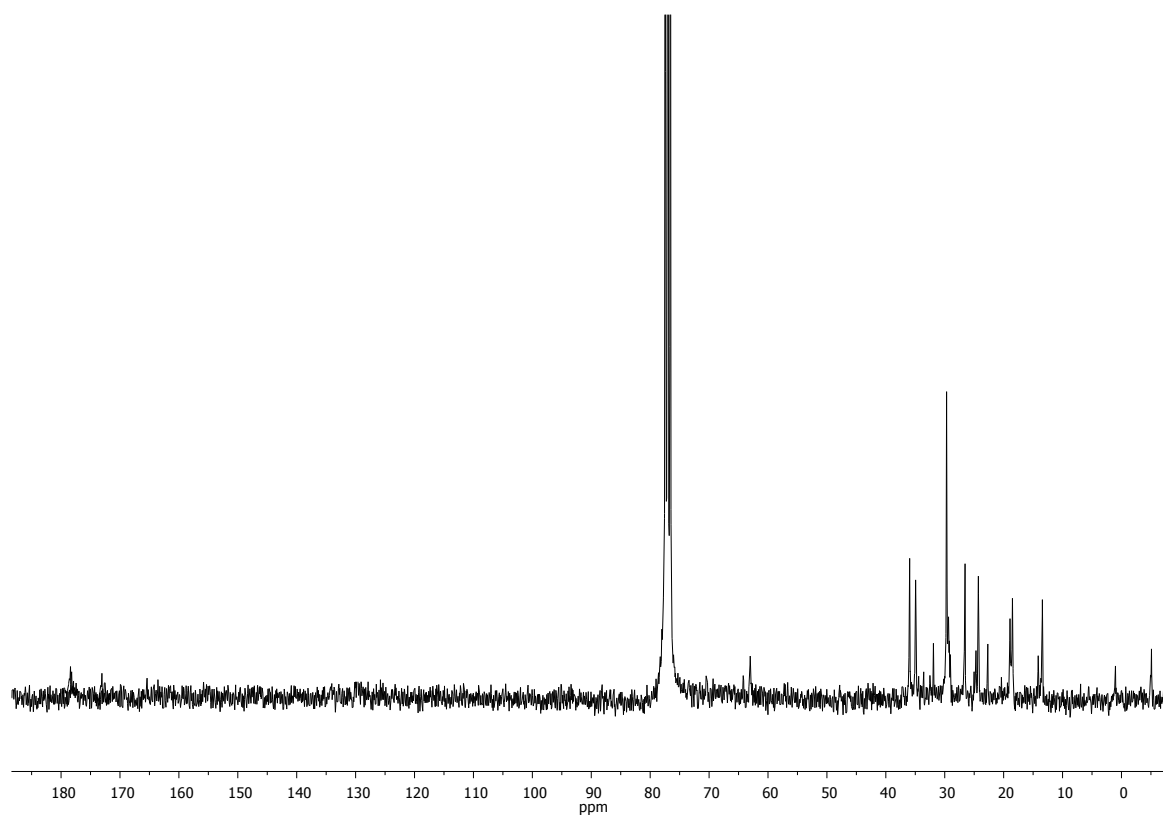

Figure S8. <sup>13</sup>C-NMR spectrum of dendron PaIG<sub>3</sub>(S-CO<sub>2</sub>H)<sub>8</sub> (**3**) in CDCl<sub>3</sub>.

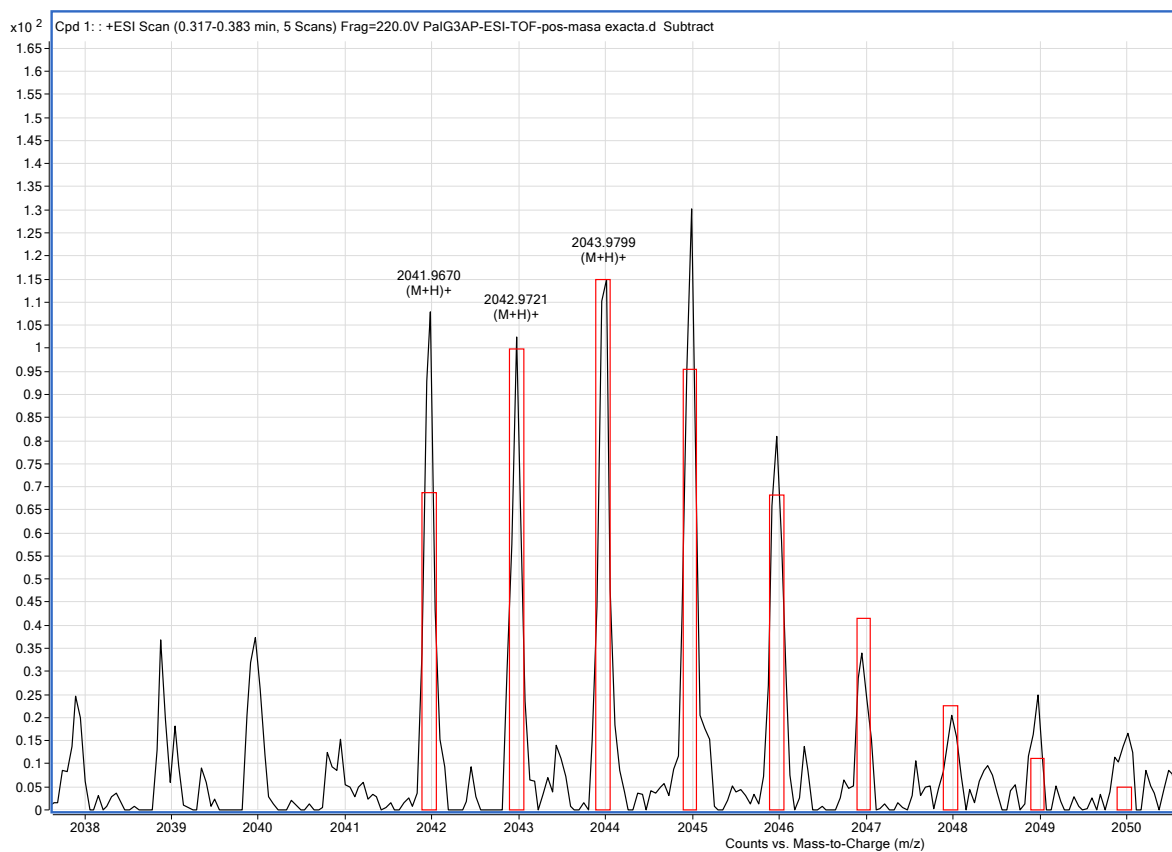

Figure S9. Molecular ion spectrum of dendron  $\text{PalG}_3(\text{S-CO}_2\text{H})_8$  (**3**).

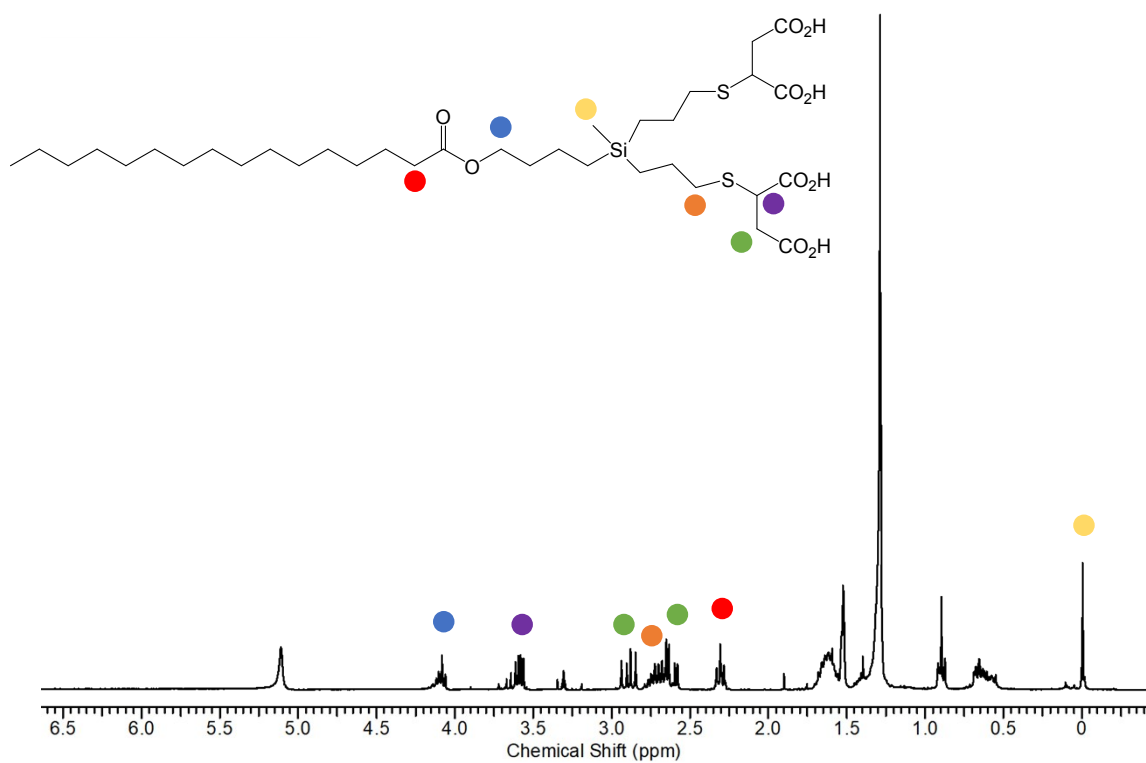

Figure S10.  $^1\text{H-NMR}$  spectrum of dendron  $\text{PalG}_1(\text{S}-(\text{CO}_2\text{H})_2)_2$  (**4**) in  $\text{CD}_3\text{OD}$ .



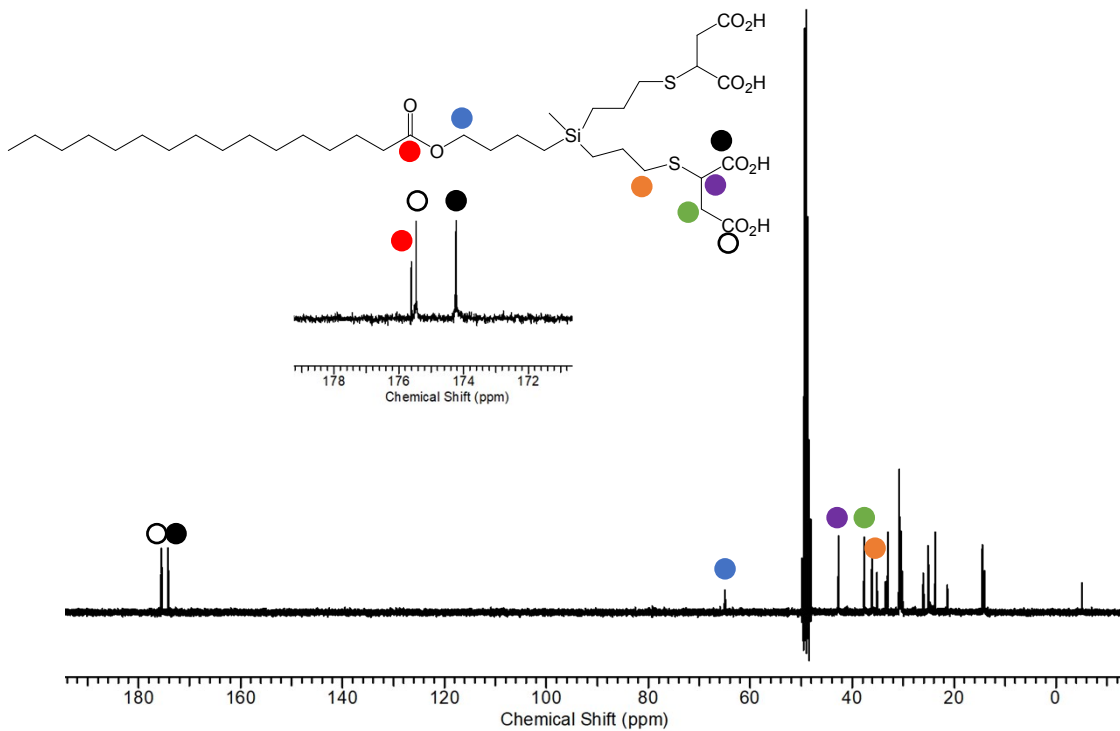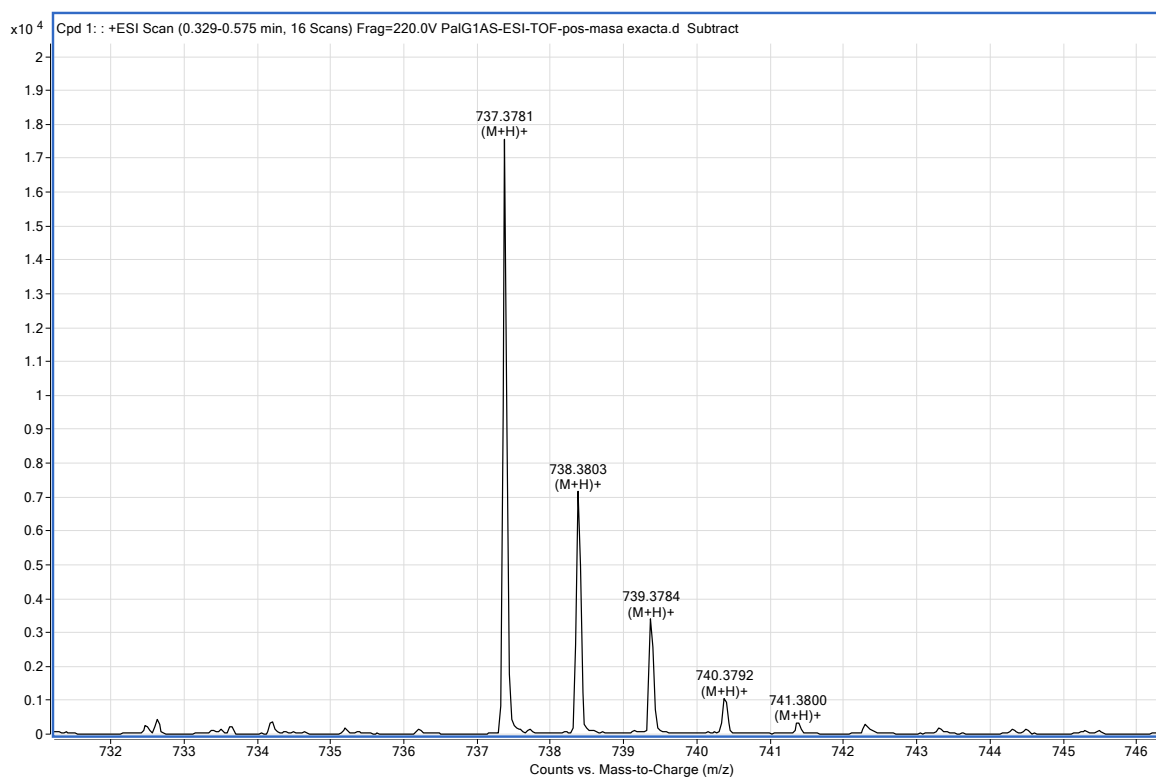

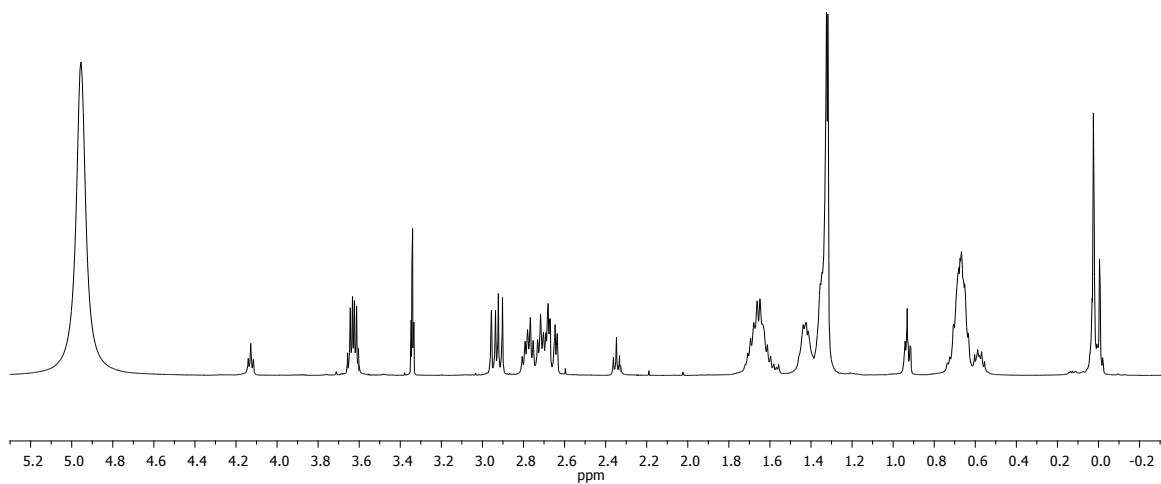

Figure S13. <sup>1</sup>H-NMR spectrum of dendron PaIG<sub>2</sub>(S-(CO<sub>2</sub>H)<sub>2</sub>)<sub>4</sub> (**5**) in CD<sub>3</sub>OD.

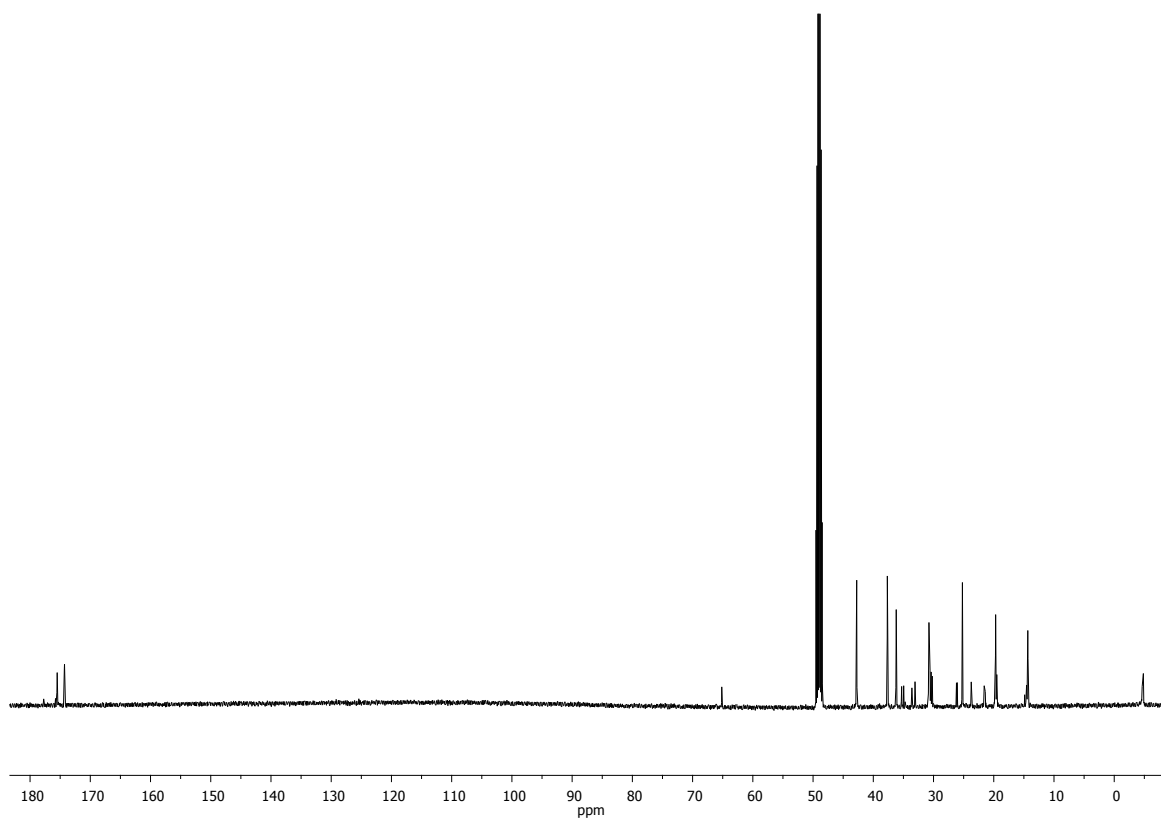

Figure S14. <sup>13</sup>C-NMR spectrum of dendron PaIG<sub>2</sub>(S-(CO<sub>2</sub>H)<sub>2</sub>)<sub>4</sub> (**5**) in CD<sub>3</sub>OD.

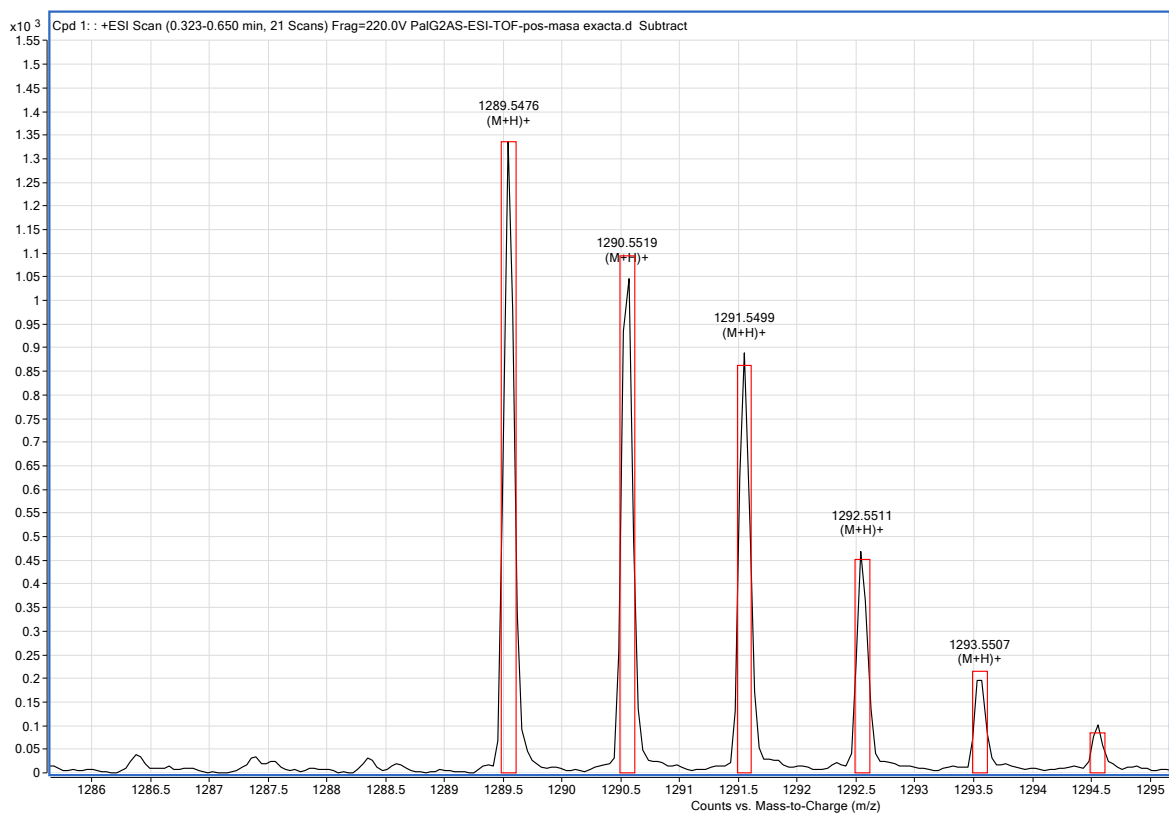

Figure S15. Molecular ion spectrum of dendron  $\text{PalG}_2(\text{S}-(\text{CO}_2\text{H})_2)_4$  (**5**)

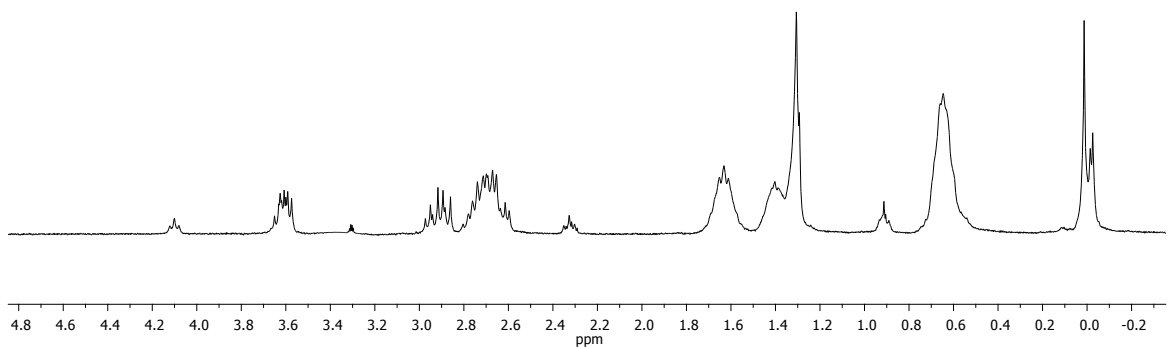

Figure S16.  $^1\text{H}$ -NMR spectrum of dendron  $\text{PalG}_3(\text{S}-(\text{CO}_2\text{H})_2)_8$  (**6**) in  $\text{CD}_3\text{OD}$ .

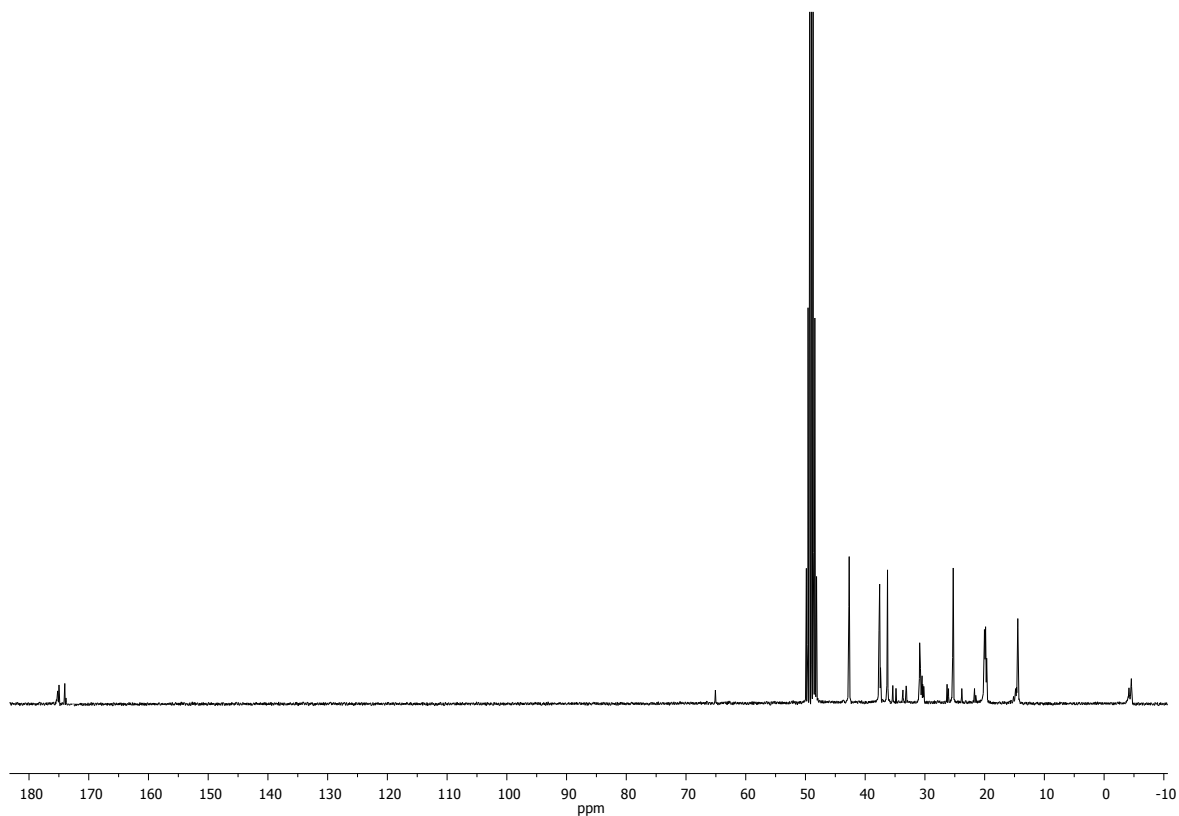

Figure S17.  $^{13}\text{C}$ -NMR spectrum of dendron  $\text{PalG}_3(\text{S}-(\text{CO}_2\text{H})_2)_8$  (**6**) in  $\text{CD}_3\text{OD}$ .

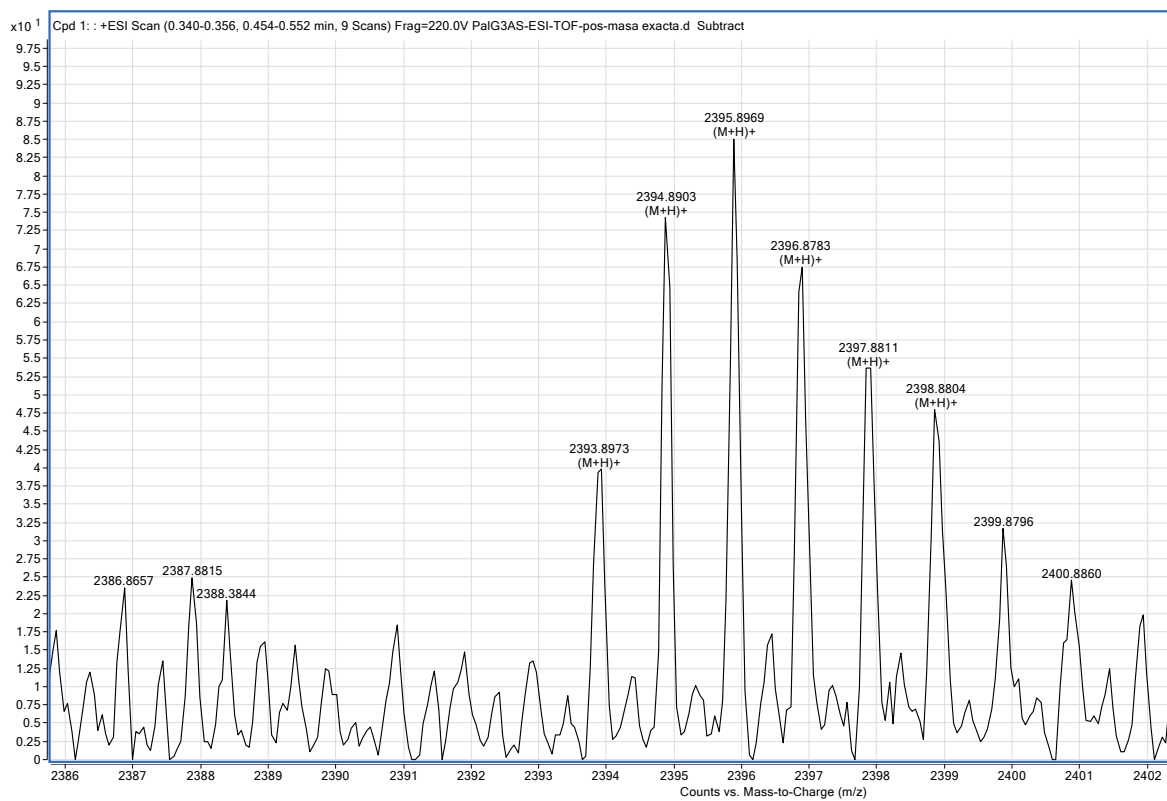

Figure S18. Molecular ion spectrum of dendron  $\text{PaIG}_3(\text{S}-(\text{CO}_2\text{H})_2)_8$  (**6**)

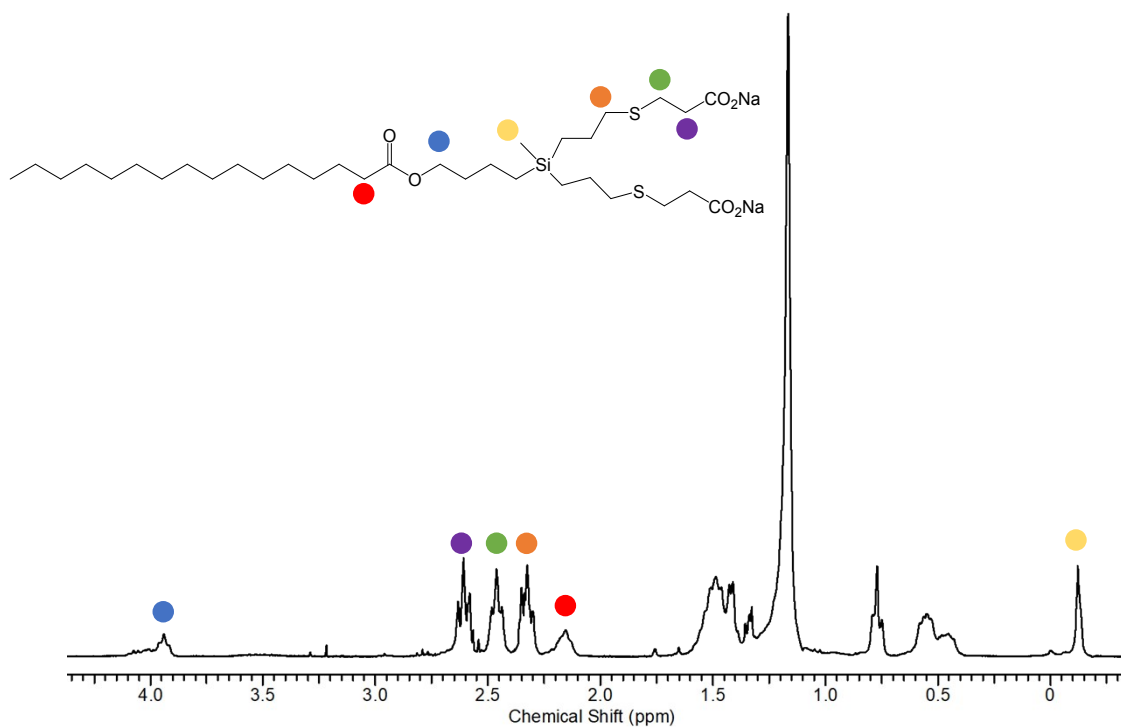

Figure S19.  $^1\text{H-NMR}$  spectrum of dendron  $\text{PaIG}_1(\text{S-CO}_2\text{Na})_2$  (**7**) in  $\text{D}_2\text{O}$ .

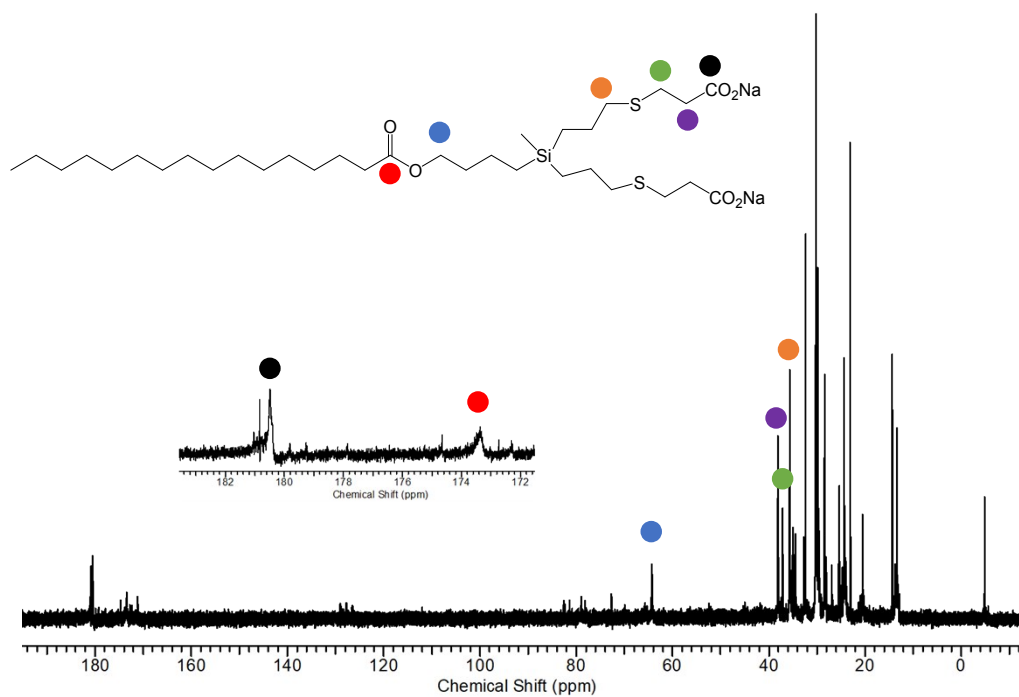

Figure S20.  $^{13}\text{C-NMR}$  spectrum of dendron  $\text{PaIG}_1(\text{S-CO}_2\text{Na})_2$  (**7**) in  $\text{D}_2\text{O}$ .

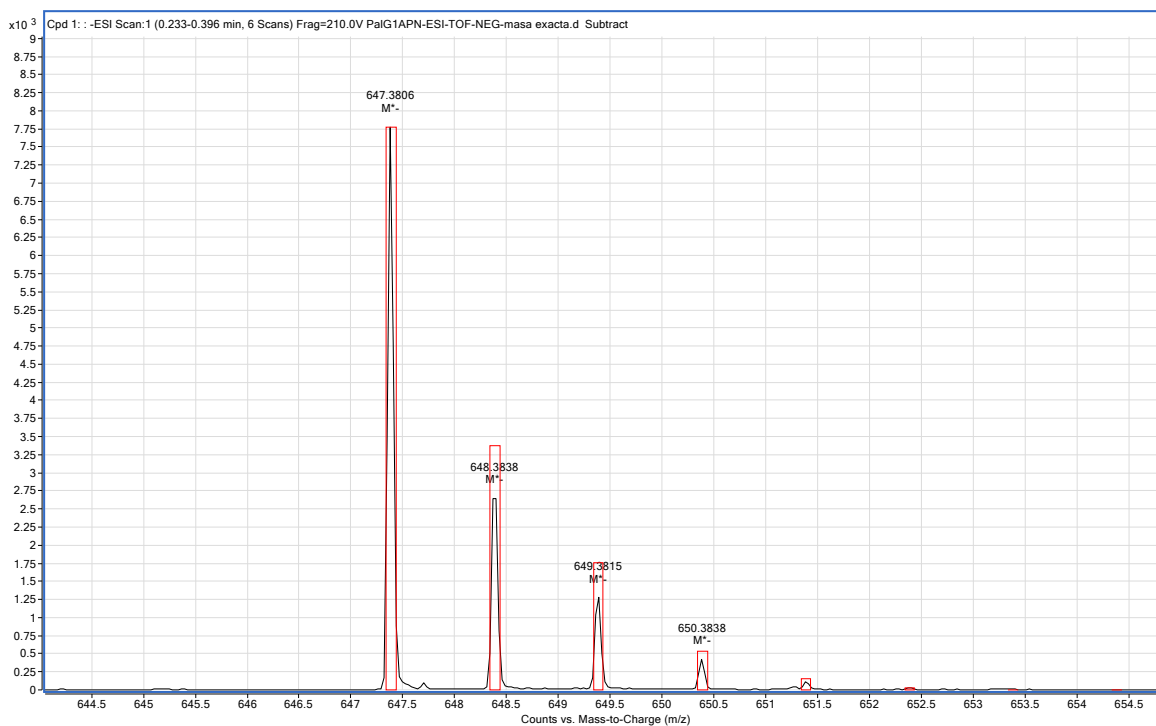

Figure S21. Molecular ion spectrum of dendron PaIG<sub>1</sub>(S-CO<sub>2</sub>Na)<sub>2</sub> (**7**).

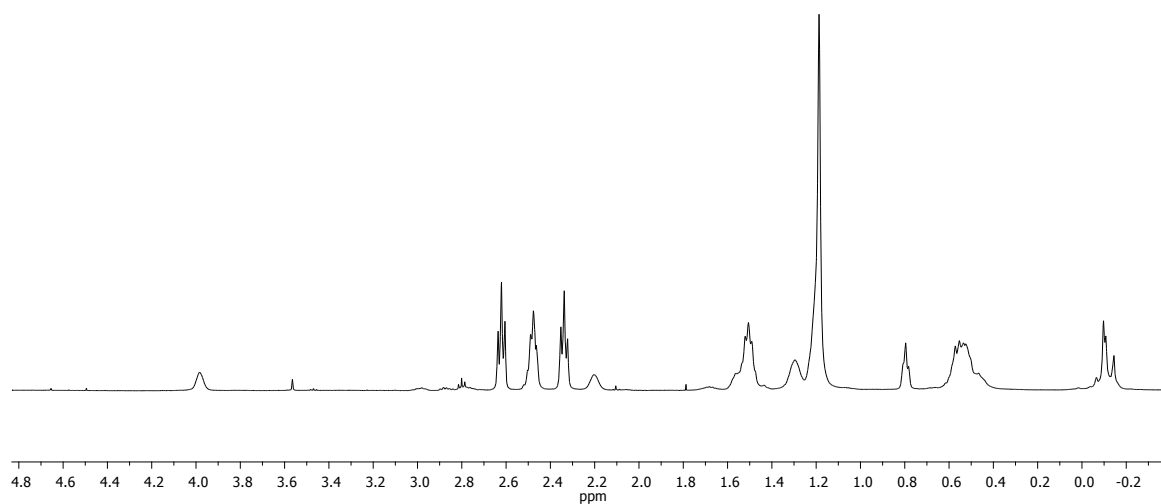

Figure S22. <sup>1</sup>H-NMR spectrum of dendron PaIG<sub>2</sub>(S-CO<sub>2</sub>Na)<sub>4</sub> (**8**) in D<sub>2</sub>O.

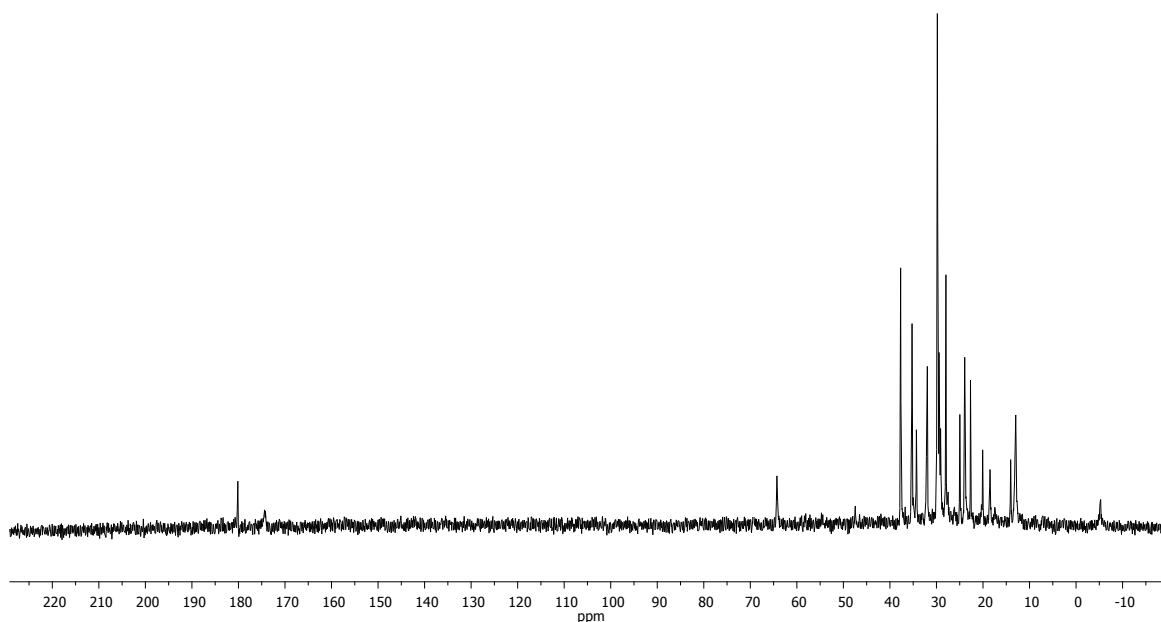

Figure S23. <sup>13</sup>C-NMR spectrum of dendron PaIG<sub>2</sub>(S-CO<sub>2</sub>Na)<sub>4</sub> (**8**) in D<sub>2</sub>O.

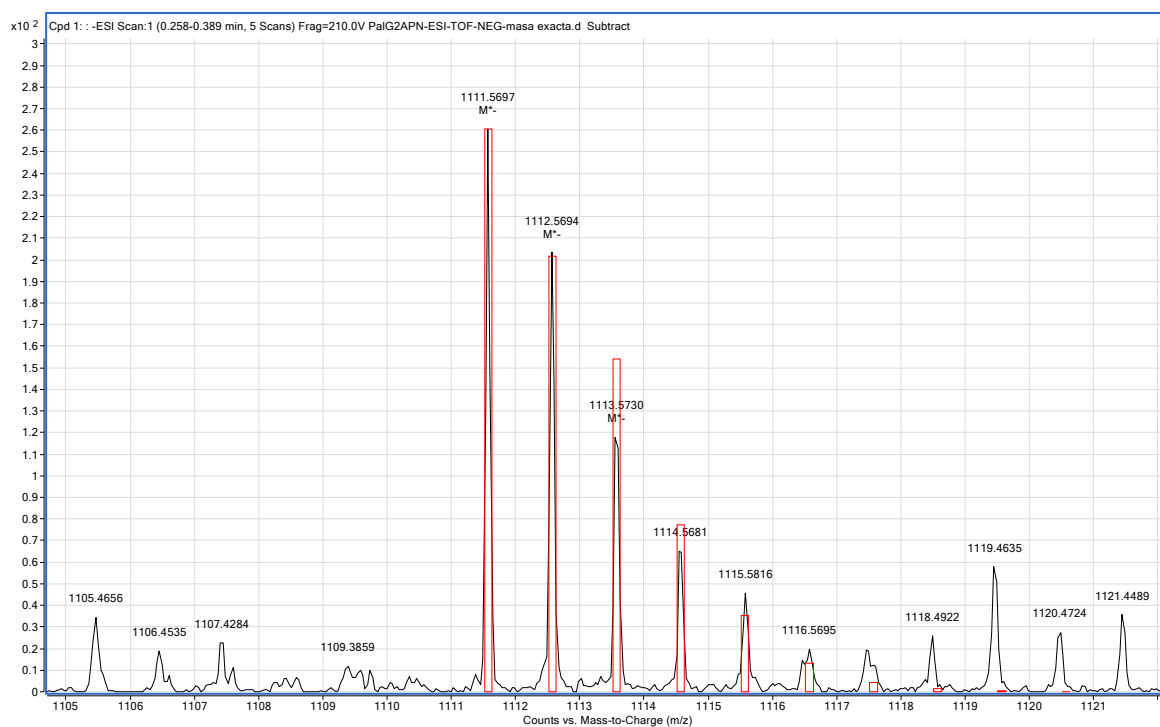

Figure S24. Molecular ion spectrum of dendron PaIG<sub>2</sub>(S-CO<sub>2</sub>Na)<sub>4</sub> (**8**).

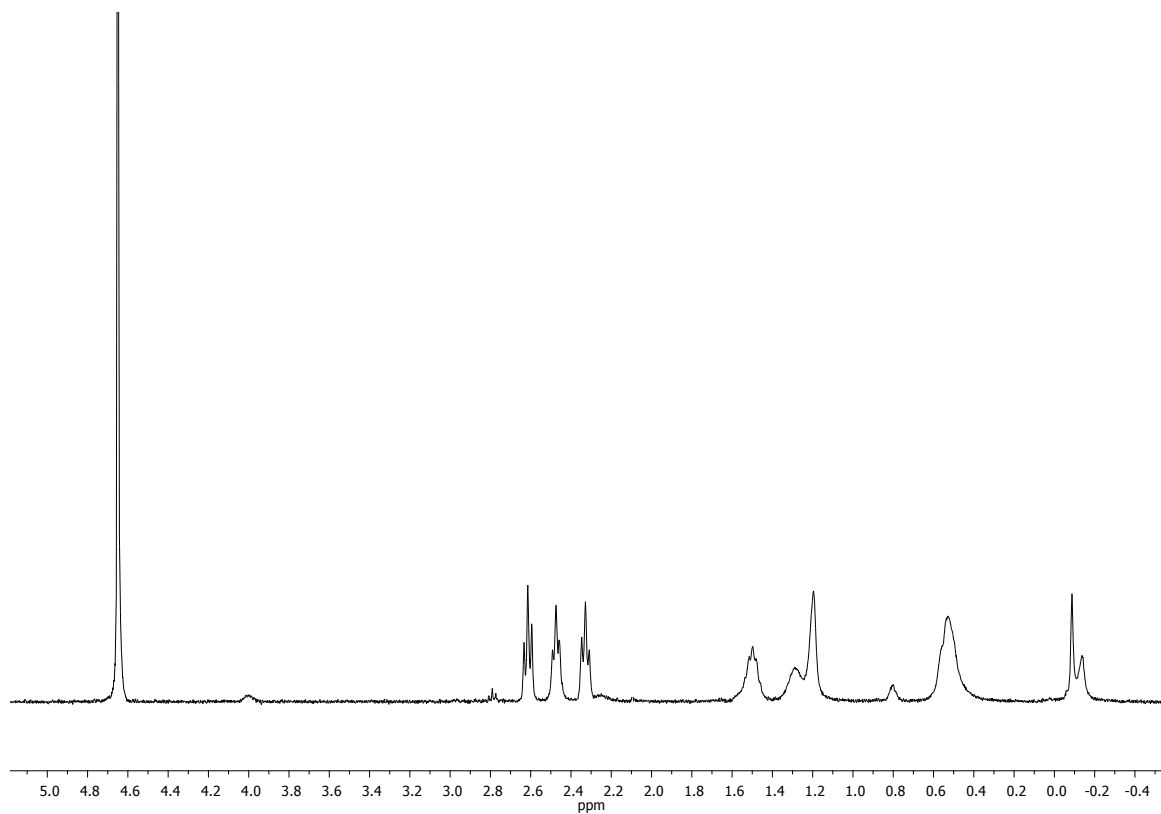

Figure S25. <sup>1</sup>H-NMR spectrum of dendron PaIG<sub>3</sub>(S-CO<sub>2</sub>Na)<sub>8</sub> (**8**) in D<sub>2</sub>O.

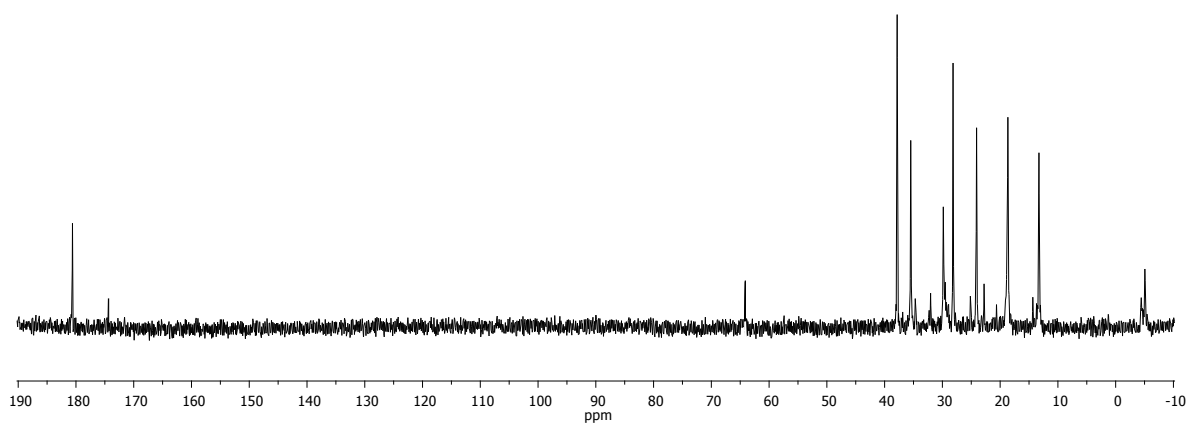

Figure S26. <sup>13</sup>C-NMR spectrum of dendron PaIG<sub>3</sub>(S-CO<sub>2</sub>Na)<sub>8</sub> (**8**) in D<sub>2</sub>O.



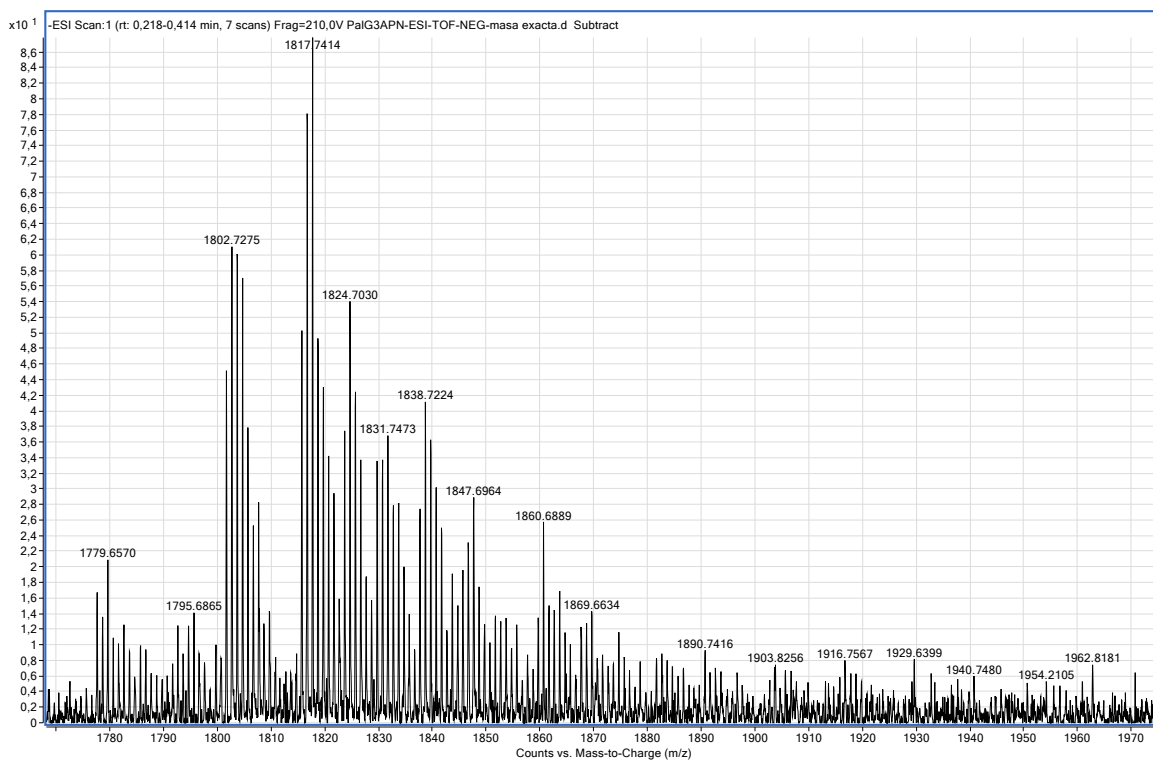

Figure S27. Molecular ion spectrum of dendron  $\text{PaIG}_3(\text{S-CO}_2\text{Na})_8$  (**8**).

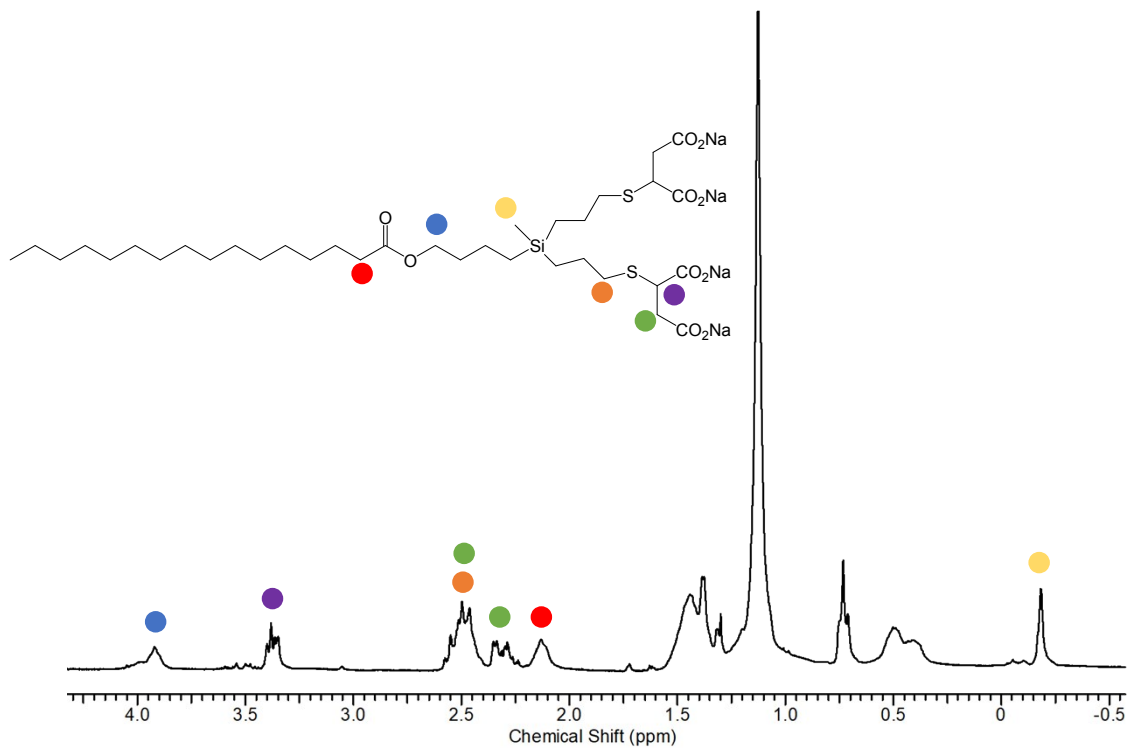

Figure S28.  $^1\text{H-NMR}$  spectrum of dendron  $\text{PaIG}_1(\text{S}-(\text{CO}_2\text{H})_2)_2$  (**10**) in  $\text{D}_2\text{O}$ .

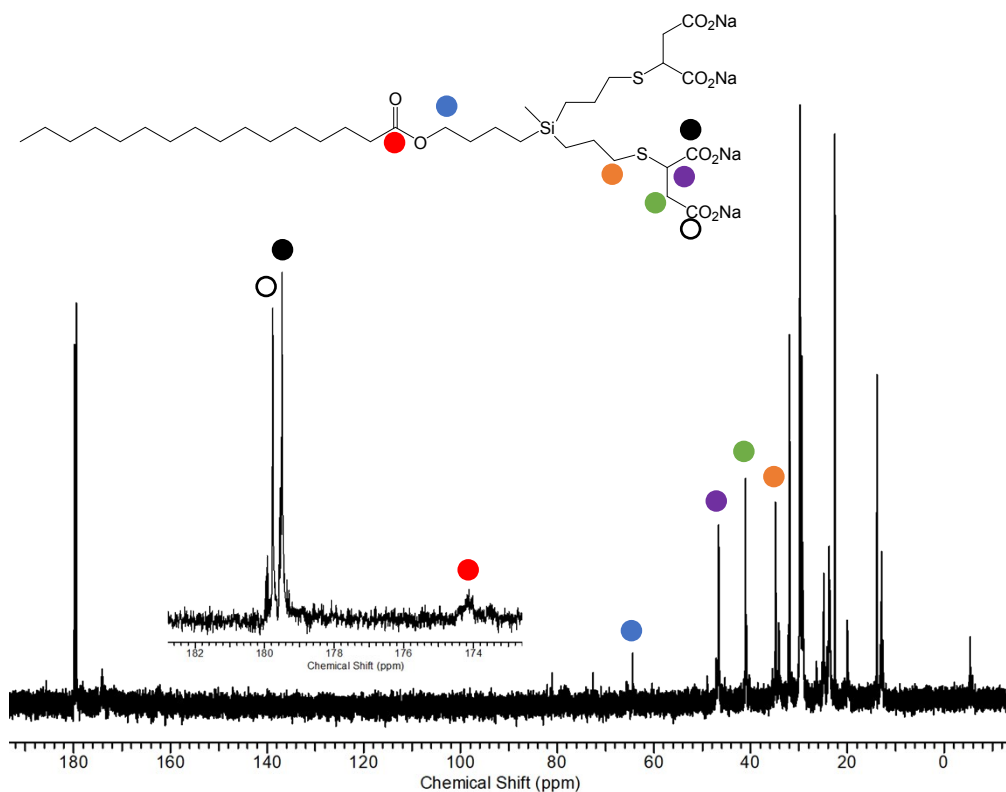

Figure S29.  $^{13}\text{C}$ -NMR spectrum of dendron  $\text{PalG}_1(\text{S}(\text{CO}_2\text{Na})_2)_2$  (**10**) in  $\text{D}_2\text{O}$ .

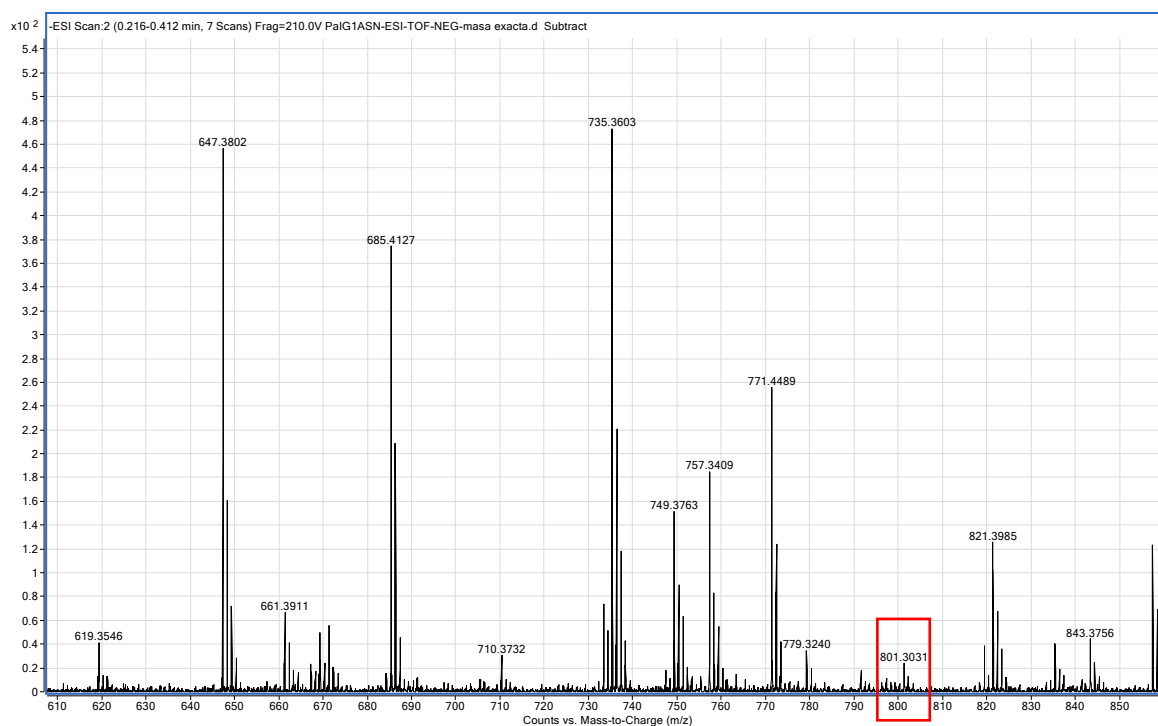

Figure S30. Mass spectrum of dendron  $\text{PalG}_1(\text{S}(\text{CO}_2\text{Na})_2)_2$  (**10**).

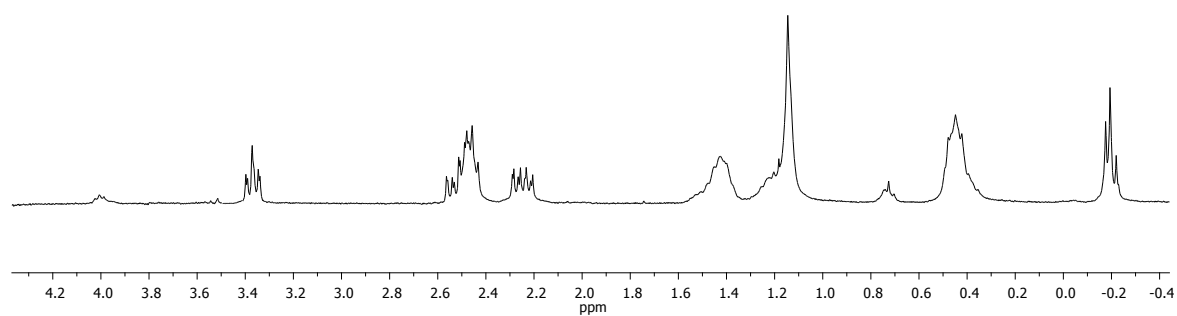

Figure S31. <sup>1</sup>H-NMR spectrum of dendron PaIG<sub>2</sub>(S-(CO<sub>2</sub>H)<sub>2</sub>)<sub>4</sub> (**11**) in D<sub>2</sub>O.

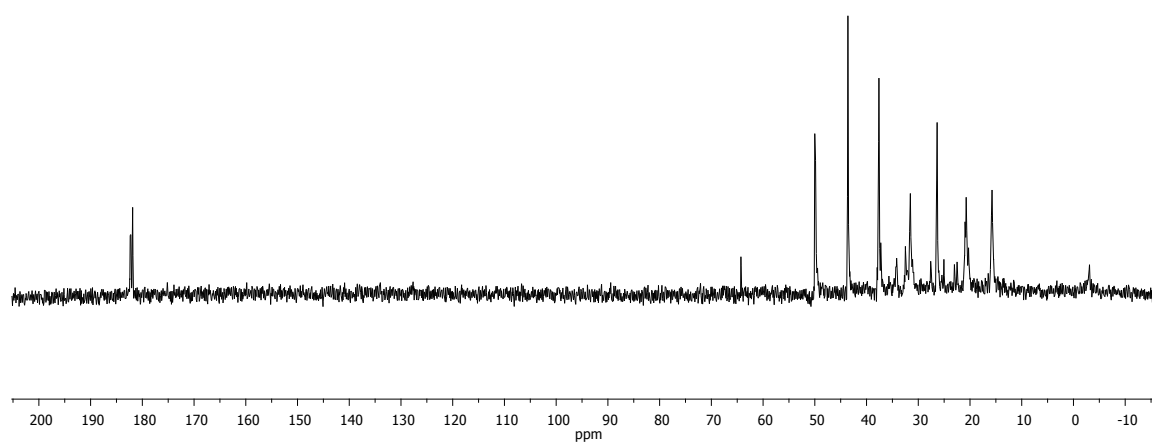

Figure S32. <sup>13</sup>C-NMR spectrum of dendron PaIG<sub>2</sub>(S-(CO<sub>2</sub>Na)<sub>2</sub>)<sub>4</sub> (**11**) in D<sub>2</sub>O.

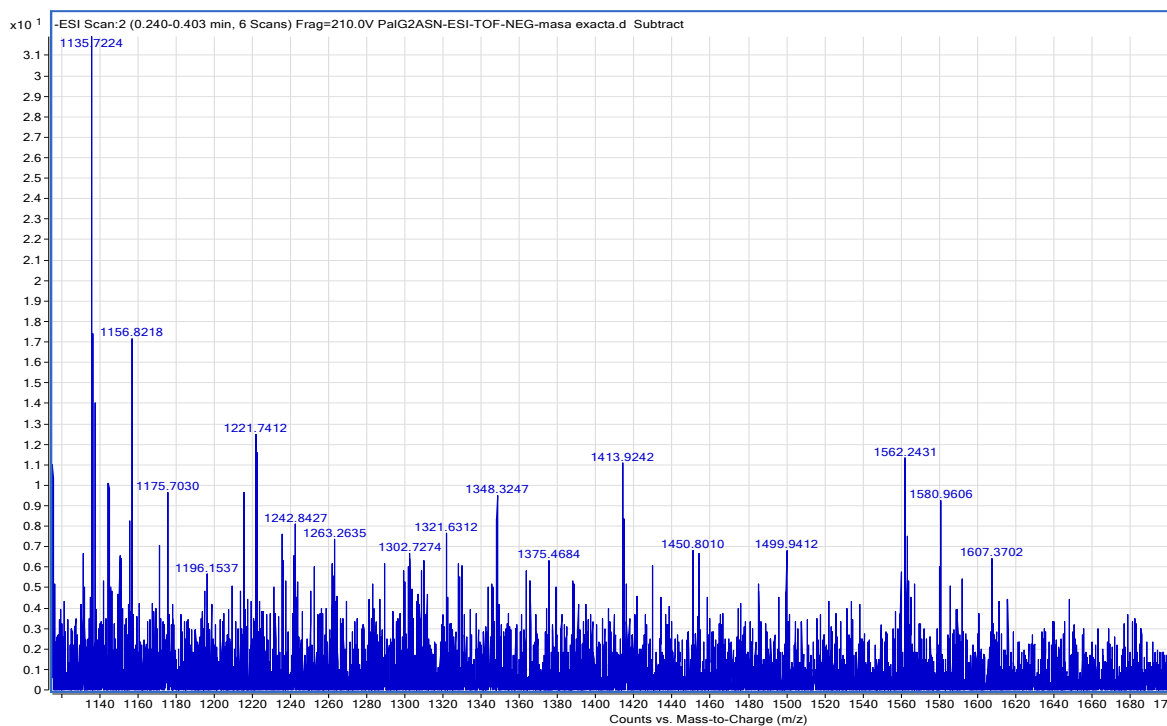

Figure S33. Mass spectrum of dendron  $\text{PaIG}_2(\text{S}-(\text{CO}_2\text{Na})_2)_4$  (**11**)

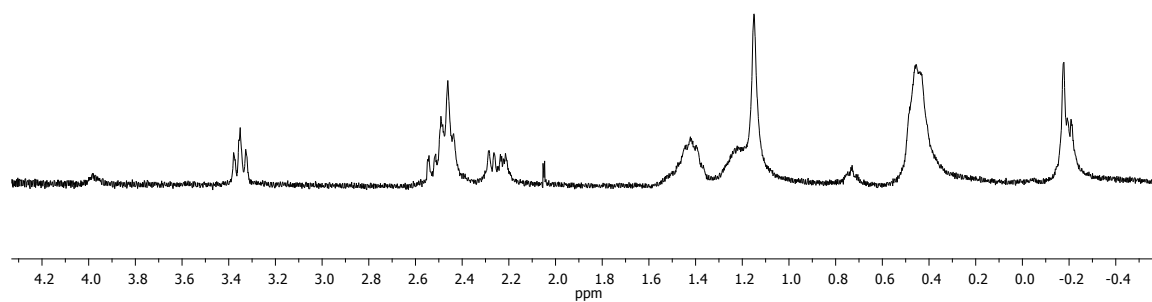

Figure S34.  $^1\text{H-NMR}$  spectrum of dendron  $\text{PaIG}_3(\text{S}-(\text{CO}_2\text{H})_2)_8$  (**12**) in  $\text{D}_2\text{O}$ .

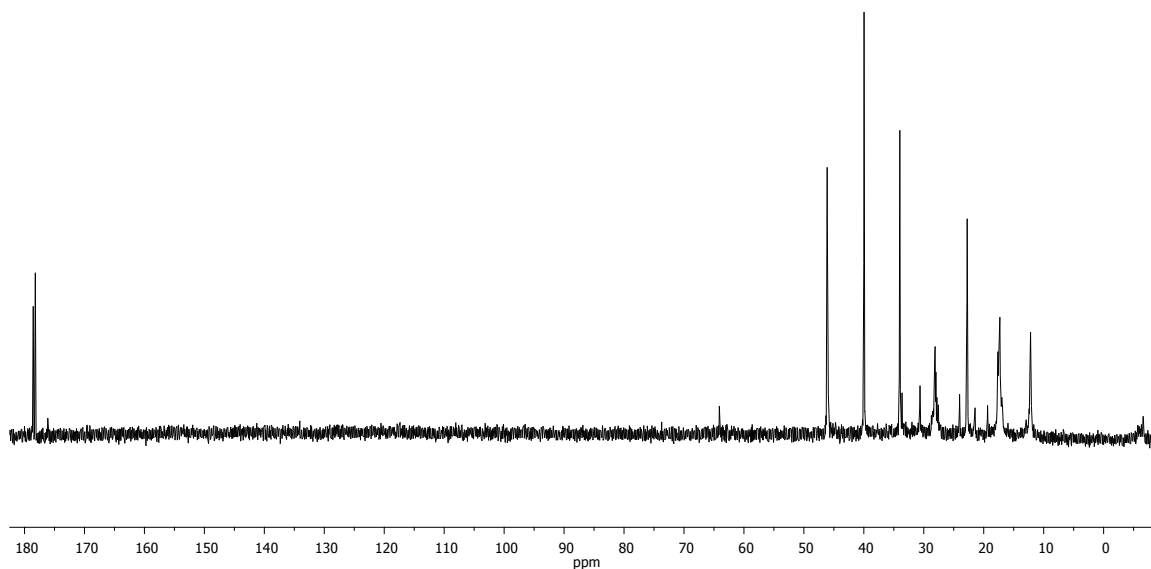

Figure S35.  $^{13}\text{C}$ -NMR spectrum of dendron  $\text{PaIG}_3(\text{S}-(\text{CO}_2\text{Na})_2)_8$  (**12**) in  $\text{D}_2\text{O}$ .

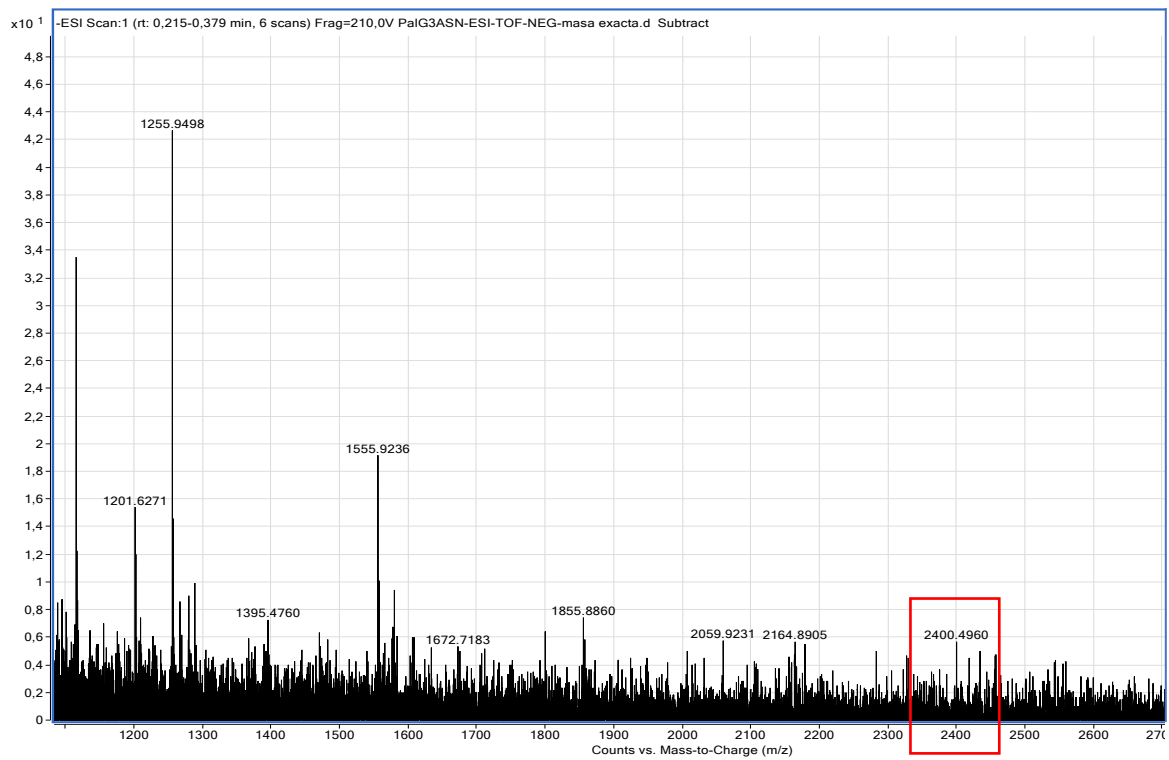

Figure S36. Mass spectrum of dendron  $\text{PaIG}_3(\text{S}-(\text{CO}_2\text{Na})_2)_8$  (**12**)

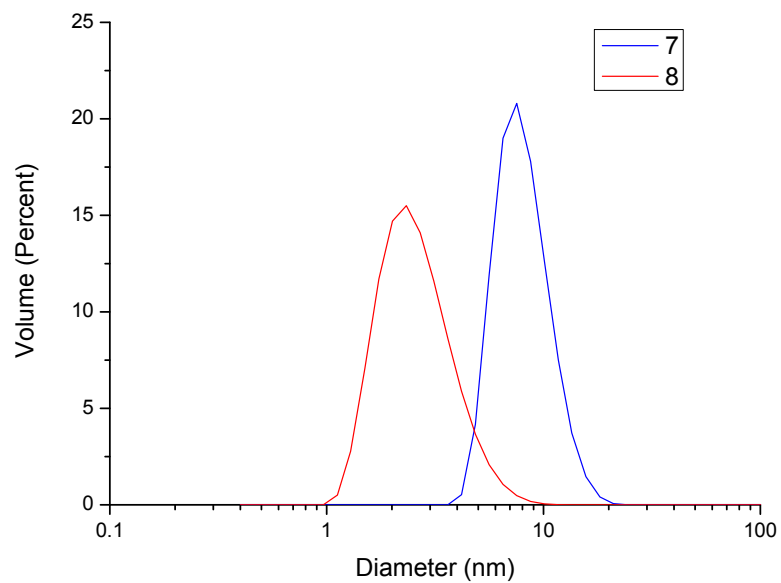

Figure S37. Size distribution of  $\text{PalG}_n(\text{S-CO}_2\text{Na})_m$  (**7-8**) measured by DLS.

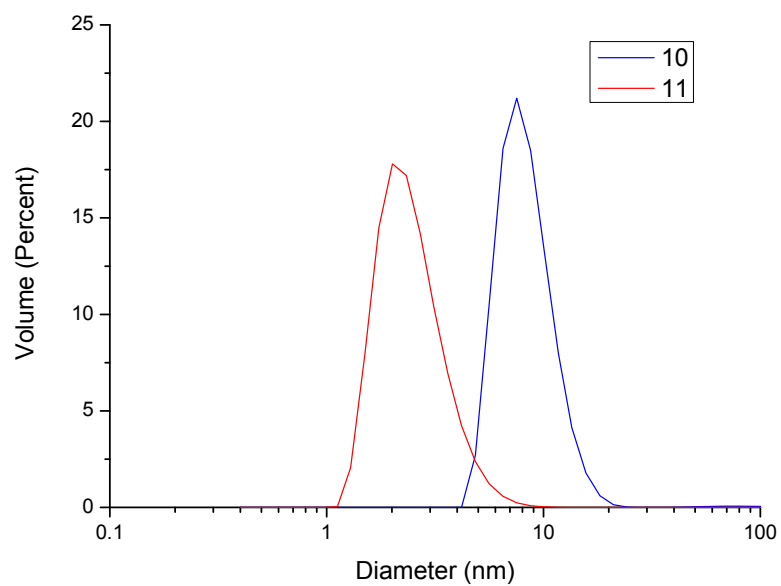

Figure S38. Size distribution of  $\text{PalG}_n(\text{S}-(\text{CO}_2\text{Na})_2)_m$  (**10-11**) measured by DLS.

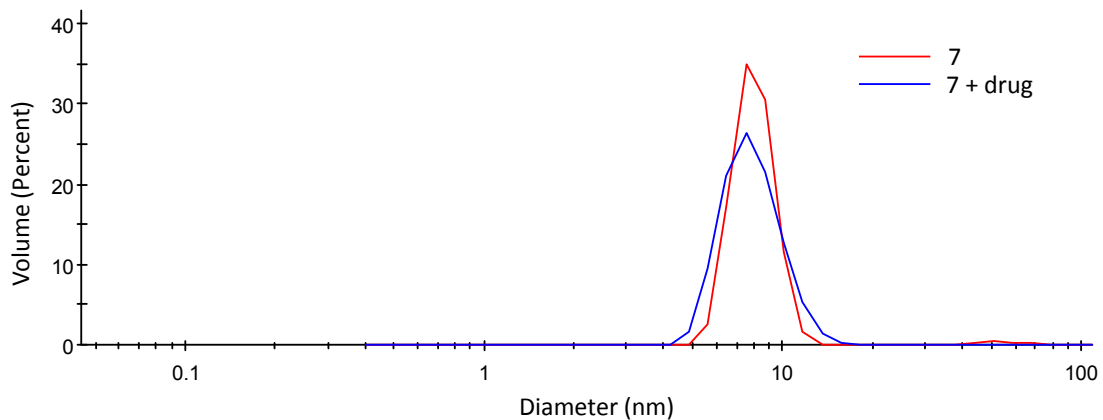

Figure S39. Size distribution of  $\text{PaIG}_1(\text{S-CO}_2\text{Na})_2$  (**7**) with and without ibuprofen sodium salt measured by DLS.

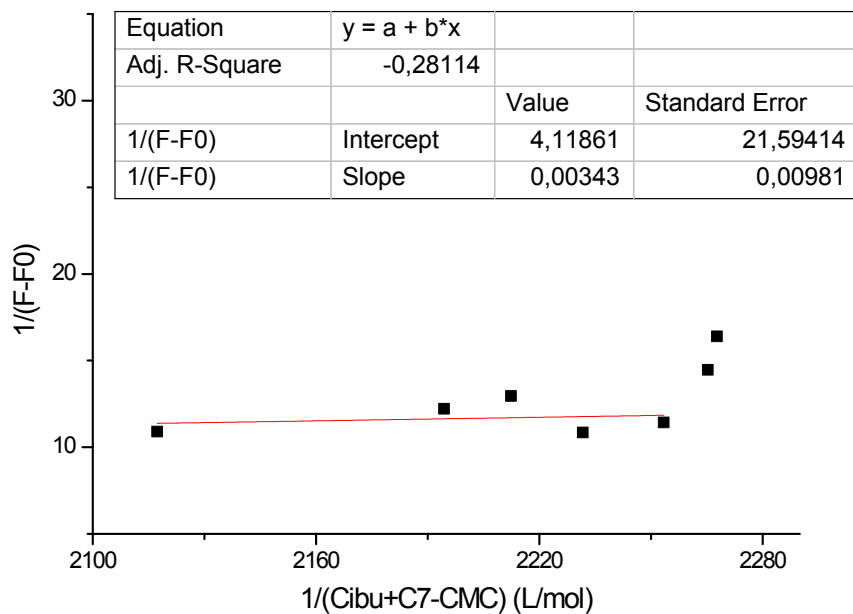

Figure S40.  $1/F-F_0$  vs  $1/([\text{Drug}] + [\text{Dendron}] - \text{CMC})$  graphic of ibuprofen sodium salt encapsulated by **7**.

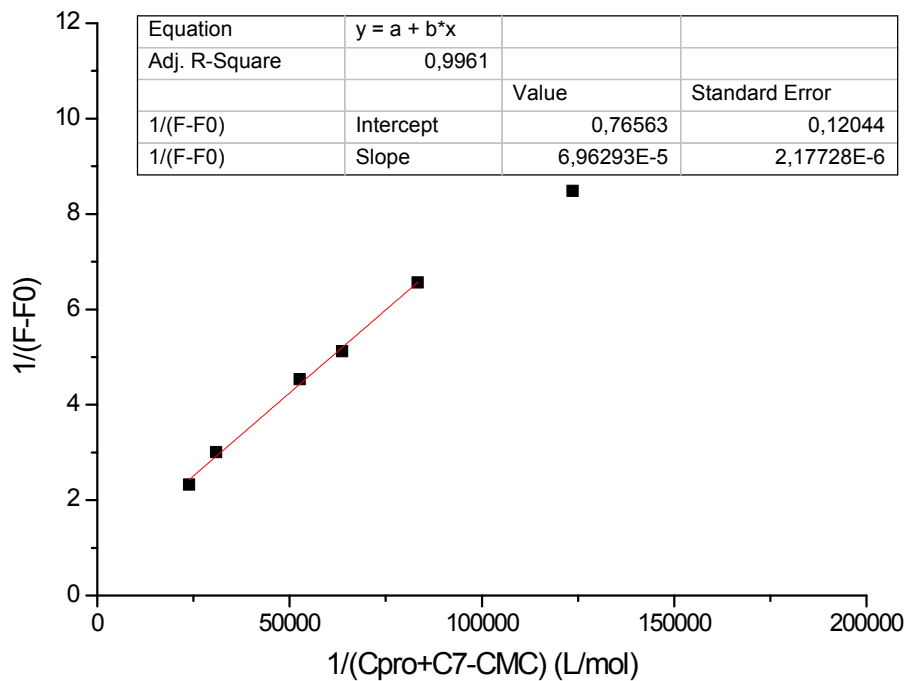

Figure S41.  $1/(F-F_0)$  vs  $1/([Drug]+[Dendron]-CMC)$  graphic of procaine hydrochloride encapsulated by **7**.

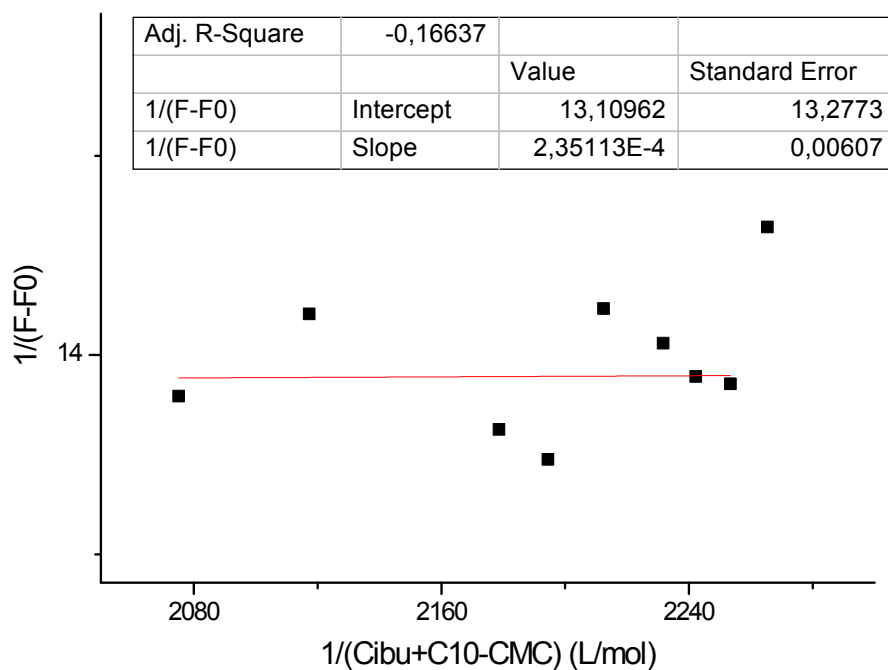

Figure S42.  $1/(F-F_0)$  vs  $1/([Drug]+[Dendron]-CMC)$  graphic of ibuprofen sodium salt encapsulated by **10**.



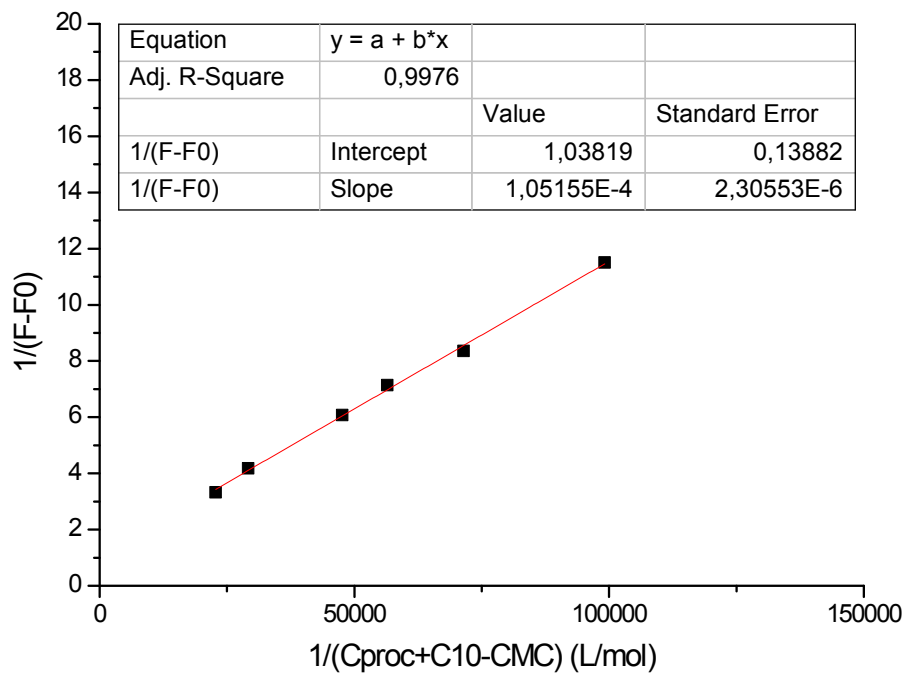

Figure S43.  $1/(F-F_0)$  vs  $1/([Drug]+[Dendron]-CMC)$  graphic of procaine hydrochloride encapsulated by **10**.
